# Supplementary material
Source: PubMed Central journal article supplement (PMC2773714)

|                                    |              |   |   |   |   |   |   |   |   |   |   |  |   |
|------------------------------------|--------------|---|---|---|---|---|---|---|---|---|---|--|---|
| 90K                                | PRPF3_HUMAN  | X | X | X |   |   | ● | ● |   |   |   |  | X |
| 61K                                | PRP31_HUMAN  |   | X | X |   |   | ● | ● |   |   |   |  |   |
| 60K                                | PRP4_HUMAN   |   | X | X | X |   | ● | ● |   |   |   |  | X |
| 20K                                | PPIH_HUMAN   |   | X | X |   |   | ● |   |   |   |   |  |   |
| 15.5K                              | NH2L1_HUMAN  |   | X | X |   |   |   |   |   |   |   |  |   |
| <b><u>tri-snRNP</u></b>            |              |   |   |   |   |   |   |   |   |   |   |  |   |
| 110K                               | SNUT1_HUMAN  |   | X | X | X | X | ● | ● | ⊙ |   |   |  | X |
| 65K                                | SNUT2_HUMAN  |   | X |   |   |   | ● | ● | ⊙ |   |   |  |   |
| SNRNP27                            | SNR27_HUMAN  |   | X |   |   |   |   |   |   |   |   |  |   |
| hSnu23                             | ZMAT2_HUMAN  |   | X | X | X |   |   |   |   |   |   |  |   |
| TFIP11                             | TFP11_HUMAN  |   | X |   | X | X |   |   |   |   |   |  |   |
| hPRP38                             | PR38A_HUMAN  |   | X |   |   |   |   |   |   |   |   |  |   |
| <b><u>hPRP19/CDC5L complex</u></b> |              |   |   |   |   |   |   |   |   |   |   |  |   |
| CCAP1                              | HSP7C_HUMAN  | X | X |   |   |   | ● | ⊙ | ⊙ |   |   |  |   |
| CCAP2                              | Q9UI29_HUMAN | X | X |   | X | X |   |   |   |   |   |  |   |
| CDC5L                              | CDC5L_HUMAN  | X | X | X | X | X |   |   |   |   |   |  |   |
| hPRP19                             | PRP19_HUMAN  | X | X | X | X | X |   |   | ⊙ |   |   |  |   |
| Catenin, β-like 1                  | CTBL1_HUMAN  | X | X |   |   |   |   |   |   |   |   |  |   |
| PRL1                               | PLRG1_HUMAN  |   | X |   | X | X |   |   |   |   |   |  |   |
| BCAS2                              | SPF27_HUMAN  | X | X |   | X |   |   |   |   |   |   |  |   |
| Npw38BP                            | WBP11_HUMAN  | X | X | X |   |   | ● | ● | ⊙ |   | 4 |  | X |
| Npw38                              | PQBP1_HUMAN  | X | X | X |   |   | ● | ● |   |   |   |  |   |
| FBP21                              | WBP4_HUMAN   |   | X | X |   |   |   |   |   |   |   |  |   |
| hPRP4-Kinase                       | PRP4B_HUMAN  |   | X | X |   |   |   |   |   |   |   |  |   |
| TBLR1                              | TBL1R_HUMAN  |   |   | X |   |   |   |   | ● |   |   |  |   |
| SMC1                               | SMC1A_HUMAN  |   |   | X |   |   |   |   |   |   |   |  |   |
| p220(NPAT)                         | Q14207_HUMAN |   |   | X |   |   |   |   |   |   |   |  |   |
| N-CoR1                             | NCOR1_HUMAN  |   |   | X |   |   |   |   | ● |   |   |  |   |
| <b><u>hPRP19/CDC5L-related</u></b> |              |   |   |   |   |   |   |   |   |   |   |  |   |
| CRNK1/hSYF3                        | CRNL1_HUMAN  |   | X | X | X | X |   |   |   |   |   |  |   |
| Cyp-E                              | PPIE_HUMAN   |   | X |   | X | X |   |   |   |   |   |  |   |
| GCIP p29 (fSAP29)                  | SYF2_HUMAN   |   | X |   | X | X |   |   |   |   |   |  |   |
| G10 (fSAP17)                       | BUD31_HUMAN  |   | X |   | X |   |   |   |   |   |   |  |   |
| hIsy1 (fSAP133)                    | ISY1_HUMAN   |   | X |   | X | X |   |   |   |   |   |  |   |
| XAB2                               | SYF1_HUMAN   |   | X |   | X | X |   |   |   |   |   |  |   |
| KIAA0560 (fSAP164)                 | AQR_HUMAN    |   | X |   | X | X |   |   |   |   |   |  |   |
| MGC23918                           | CCD12_HUMAN  |   | X |   | X |   |   |   |   |   |   |  |   |
| PPIase-like 1                      | PPIL1_HUMAN  |   | X |   | X | X |   |   |   |   |   |  |   |
| PRCC                               | PRCC_HUMAN   | X | X |   |   |   |   |   |   |   |   |  |   |
| RBM22 (fSAP47)                     | RBM22_HUMAN  |   | X |   | X | X |   |   |   |   | 1 |  |   |
| SKIP                               | SNW1_HUMAN   |   | X | X | X | X |   |   |   |   |   |  |   |
| <b><u>hnRNP</u></b>                |              |   |   |   |   |   |   |   |   |   |   |  |   |
| E1B-AP5                            | HNRL1_HUMAN  |   |   |   |   |   |   |   | ● | ○ |   |  |   |
| hnRNP A0                           | ROA0_HUMAN   |   | X |   |   |   |   |   | ● |   |   |  |   |
| hnRNP A1                           | ROA1_HUMAN   | X | X |   |   | X | ● | ● |   |   |   |  |   |

|             |             |   |   |   |   |   |   |   |   |  |   |   |   |
|-------------|-------------|---|---|---|---|---|---|---|---|--|---|---|---|
| hnRNP A3    | ROA3_HUMAN  | x | x |   |   |   | ● |   |   |  |   |   |   |
| hnRNP A/B   | ROAA_HUMAN  | x | x |   |   |   |   | ● |   |  |   |   |   |
| hnRNP A2/B1 | ROA2_HUMAN  | x | x |   | x | x | ● | ● |   |  |   |   |   |
| hnRNP C1/C2 | HNRPC_HUMAN | x | x | x | x | x | ● | ● |   |  |   |   |   |
| hnRNP F     | HNRPF_HUMAN | x |   |   |   | x | ● | ● | ⊙ |  | x | x |   |
| hnRNP G     | HNRPG_HUMAN | x |   |   | x | x | ● | ● | ⊙ |  |   |   |   |
| hnRNP H     | HNRH1_HUMAN |   |   |   |   | x |   |   | ● |  |   |   |   |
| hnRNP H2    | HNRH2_HUMAN | x |   |   |   |   |   |   |   |  |   |   |   |
| hnRNP K     | HNRPK_HUMAN |   |   |   |   | x | ● | ● | ⊙ |  | x | x | x |
| hnRNP L     | HNRPL_HUMAN |   |   |   | x |   | ● |   |   |  |   |   |   |
| hnRNP M     | HNRPM_HUMAN | x | x |   |   | x | ● | ⊙ | ⊙ |  |   |   |   |
| hnRNP Q     | HNRPQ_HUMAN | x | x |   |   |   | ● | ● | ○ |  |   |   |   |
| hnRNP R     | HNRPR_HUMAN | x |   |   |   | x | ● |   |   |  |   |   |   |
| hnRNP U     | HNRPU_HUMAN | x |   |   |   | x | ● | ● | ⊙ |  | x | x | x |
| PCBP1       | PCBP1_HUMAN | x | x |   |   |   | ● | ● | ○ |  |   |   |   |
| RALY        | RALY_HUMAN  | x |   |   |   |   |   |   |   |  |   |   |   |

### B\*/C complex and step II proteins

|        |              |   |  |  |   |   |  |   |   |   |  |  |  |
|--------|--------------|---|--|--|---|---|--|---|---|---|--|--|--|
| Prp16  | PRP16_HUMAN  |   |  |  |   | x |  |   |   | ○ |  |  |  |
| Prp17  | PRP17_HUMAN  | x |  |  |   | x |  | x | x |   |  |  |  |
| hPrp22 | DHX8_HUMAN   |   |  |  | x | x |  |   |   |   |  |  |  |
| hSLU7  | O95391_HUMAN | x |  |  |   | x |  |   |   |   |  |  |  |

### Cap binding complex

|       |             |   |   |   |   |   |   |  |  |  |  |  |  |
|-------|-------------|---|---|---|---|---|---|--|--|--|--|--|--|
| CBP20 | NCBP1_HUMAN | x | x | x | x |   | ● |  |  |  |  |  |  |
| CBP80 | NCBP2_HUMAN | x | x | x | x | x | ● |  |  |  |  |  |  |

### Proteins related to EJC

|               |             |   |  |  |   |   |  |  |  |  |  |  |  |
|---------------|-------------|---|--|--|---|---|--|--|--|--|--|--|--|
| ALY           | THOC4_HUMAN |   |  |  | x | x |  |  |  |  |  |  |  |
| Magoh         | MGN_HUMAN   | x |  |  |   | x |  |  |  |  |  |  |  |
| Nuk-34/eIF4A3 | IF4A3_HUMAN | x |  |  | x | x |  |  |  |  |  |  |  |
| Y14           | RBM8A_HUMAN | x |  |  |   | x |  |  |  |  |  |  |  |

### SR proteins

|                    |             |   |   |   |   |  |   |   |  |  |  |  |  |
|--------------------|-------------|---|---|---|---|--|---|---|--|--|--|--|--|
| 9G8                | SFRS7_HUMAN | x | x | x | x |  | ● | ● |  |  |  |  |  |
| SRp20              | SFRS3_HUMAN | x | x | x | x |  | ● | ● |  |  |  |  |  |
| SRp30c             | SFRS9_HUMAN | x | x |   | x |  |   |   |  |  |  |  |  |
| hTra-2 alpha       | TRA2A_HUMAN | x |   |   | x |  |   |   |  |  |  |  |  |
| SF2/ASF            | SFRS1_HUMAN | x | x |   |   |  | ● | ● |  |  |  |  |  |
| SRp40              | SFRS5_HUMAN | x | x |   |   |  | ● | ● |  |  |  |  |  |
| SRp55              | SFRS6_HUMAN | x | x |   |   |  | ● | ● |  |  |  |  |  |
| SRp75              | SFRS4_HUMAN | x | x |   |   |  |   |   |  |  |  |  |  |
| SC35 (SFRS2)       | SFRS2_HUMAN | x | x |   |   |  | ● | ● |  |  |  |  |  |
| hTra-2 beta/SFRS10 | TRA2B_HUMAN | x | x |   |   |  | ● | ● |  |  |  |  |  |

### SR-related proteins

|        |                 |   |   |  |  |   |  |  |  |  |  |  |  |
|--------|-----------------|---|---|--|--|---|--|--|--|--|--|--|--|
| ARGLU1 | ARGL1_HUMAN     | x | x |  |  |   |  |  |  |  |  |  |  |
| SRm160 | AAC0932.1 (???) | x | x |  |  | x |  |  |  |  |  |  |  |
| SRm300 | SRRM2_HUMAN     | x | x |  |  | x |  |  |  |  |  |  |  |



|                      |                   |   |   |   |   |   |   |   |   |   |
|----------------------|-------------------|---|---|---|---|---|---|---|---|---|
| <b>matrin 3</b>      | MATR3_HUMAN       | x |   |   |   |   |   |   |   |   |
| <b>PPIL2/Cyp-60</b>  | PPIL2_HUMAN       | x | x |   |   |   |   |   |   |   |
| <b>hPRP2</b>         | DHX16_HUMAN       | x |   |   |   |   |   | ● |   |   |
| <b>DDX3</b>          | DDX3X_HUMAN       | x |   |   | ● | ● | ● |   |   | x |
| <b>HSP70</b>         | HSP71_HUMAN       | x |   |   | ● | ⊙ | ● |   |   |   |
| <b>RBM4</b>          | RBM4_HUMAN        | x |   |   |   |   |   |   |   |   |
| <b>RBM7</b>          | RBM7_HUMAN        | x |   |   |   |   |   |   |   |   |
| <b>MEP50</b>         | MEP50_HUMAN       | x |   |   | ● | ● |   |   |   |   |
| <b>PRMT5 (SKB1)</b>  | ANM5_HUMAN        | x |   |   | ● | ● |   |   |   |   |
| <b>PPIL4</b>         | PPIL4_HUMAN       | x |   |   |   |   |   |   |   |   |
| <b>CyP64/PPWD</b>    | PPWD1_HUMAN       | x | x |   |   |   |   |   |   |   |
| <b>KIAA1604</b>      | Q9HCG8_HUMAN      | x |   | x |   |   |   |   |   |   |
| <b>Abstrakt</b>      | DDX41_HUMAN       | x |   | x |   |   |   |   |   |   |
| <b>Cactin</b>        | CS029_HUMAN       |   |   | x |   |   |   |   |   |   |
| <b>DGSI protein</b>  | DGC14_HUMAN       |   |   | x |   |   |   |   |   |   |
| <b>MGC4238</b>       | MORG1_HUMAN       |   |   | x |   |   |   |   |   |   |
| <b>SDCCAG10</b>      | Q6UX04_HUMAN      |   |   | x |   |   |   |   |   |   |
| <b>FRG1</b>          | FRG1_HUMAN        |   |   | x |   |   |   |   |   |   |
| <b>DKFZp434E2220</b> | ZCHC8_HUMAN       |   |   | x |   |   |   |   |   |   |
| <b>DDX35</b>         | DHX35_HUMAN       |   | x | x |   |   |   |   |   |   |
| <b>FLJ10206</b>      | GPTC1_HUMAN       |   | x | x |   |   |   |   |   |   |
| <b>FAM131B</b>       | F131B_HUMAN       |   |   | x |   |   |   |   |   |   |
| <b>C25A1.10.p</b>    | CJ071_HUMAN       |   |   | x |   |   |   |   |   |   |
| <b>S100 A8</b>       | S10A8_HUMAN       |   |   | x |   |   |   |   |   |   |
| <b>S100 A9</b>       | S10A9_HUMAN       |   |   | x |   |   |   |   |   |   |
| <b>SRp38</b>         | FUSIP_HUMAN       | x |   |   |   |   |   |   |   |   |
| <b>DBPA</b>          | DBPA_HUMAN        | x |   |   | ⊙ |   |   |   |   |   |
| <b>THOC4</b>         | THOC4_HUMAN       | x |   |   |   |   |   |   |   |   |
| <b>UAP56</b>         | DDX39_HUMAN       | x |   |   |   |   |   |   |   |   |
| <b>MT-A70</b>        | NP_066012.1 (???) | x |   |   |   |   |   |   |   |   |
| <b>Nm23</b>          | NDKA_HUMAN        | x |   |   |   |   |   |   |   |   |
| <b>NPM1</b>          | NPM_HUMAN         | x |   |   | ● | ● | ○ |   |   |   |
| <b>PCBP2</b>         | PCBP2_HUMAN       | x |   |   |   |   |   |   |   |   |
| <b>PABP</b>          | PABP1_HUMAN       | x | x | x | ● | ● | ⊙ |   |   | x |
| <b>HsKin17</b>       | O60870_HUMAN      | x | x | x |   |   |   |   |   |   |
| <b>GCFC/fsAP105</b>  | GCFC_HUMAN        | x |   |   |   |   |   |   |   |   |
| <b>NY-CO-10</b>      | Q6UX04_HUMAN      | x |   |   |   |   |   |   |   |   |
| <b>PAPB2</b>         | PABP2_HUMAN       |   | x | x |   |   |   |   |   |   |
| <b>hDbp5</b>         | DD19B_HUMAN       |   |   | x |   |   |   |   |   |   |
| <b>PSF</b>           | SFPQ_HUMAN        |   |   | x | ● | ● | ⊙ | x | x | x |
| <b>HDB/DICE1</b>     | INT6_HUMAN        |   | x |   |   |   |   | 3 |   |   |
| <b>CPSF 160K</b>     | CPSF1_HUMAN       |   |   | x | ● | ● |   |   |   |   |
| <b>PPIase-like 3</b> | PPIL3_HUMAN       |   | x | x |   |   |   |   |   |   |
| <b>KIF16B</b>        | KIF16B_HUMAN      | x | x |   |   |   |   |   |   |   |
| <b>Tip-48</b>        | RUVB2_HUMAN       | x |   |   |   |   |   |   |   |   |
| <b>ZC3H13</b>        | ZC3HD_HUMAN       |   | x |   |   |   |   |   |   |   |
| <b>p55PIK</b>        | P55G_HUMAN        |   | x |   |   |   |   |   |   |   |
| <b>TPX2</b>          | TPX2_HUMAN        |   | x |   |   |   |   |   |   |   |
| <b>TIP-49</b>        | RUVB1_HUMAN       |   | x |   |   |   |   |   |   |   |
| <b>LOC56912</b>      | CK060_HUMAN       |   | x |   |   |   |   |   |   |   |
| <b>RACK1</b>         | GBLP_HUMAN        |   | x |   |   | ● |   |   |   |   |
| <b>NOSIP</b>         | NOSIP_HUMAN       |   | x |   |   |   |   |   |   |   |

|               |              |   |
|---------------|--------------|---|
| DKFZP586O0120 | FA32A_HUMAN  | X |
| IFPS          | Q5D862_HUMAN | X |

**Translation initiation factors**

|                     |             |   |
|---------------------|-------------|---|
| EIF3EIP             | IF3EI_HUMAN | X |
| EIF3E               | EIF3E_HUMAN | X |
| EIF3B               | EIF3B_HUMAN | X |
| <b><u>EIF3I</u></b> | EIF3I_HUMAN |   |

**Ribosomal proteins**

|     |             |   |
|-----|-------------|---|
| S17 | RS17_HUMAN  | X |
| S18 | RS18_HUMAN  | X |
| S19 | RS19_HUMAN  | X |
| S20 | RS20_HUMAN  | X |
| S21 | RS21_HUMAN  | X |
| S25 | RS25_HUMAN  | X |
| L14 | RL14_HUMAN  | X |
| SA  | RSSA_HUMAN  | X |
| S2  | RS2_HUMAN   | X |
| S3  | RS3_HUMAN   | X |
| S3a | RS3A_HUMAN  | X |
| S4  | RS4Y2_HUMAN | X |
| S5  | RS5_HUMAN   | X |
| S6  | RS6_HUMAN   | X |
| S7  | RS7_HUMAN   | X |
| S12 | RS12_HUMAN  | X |
| S13 | RS13_HUMAN  | X |

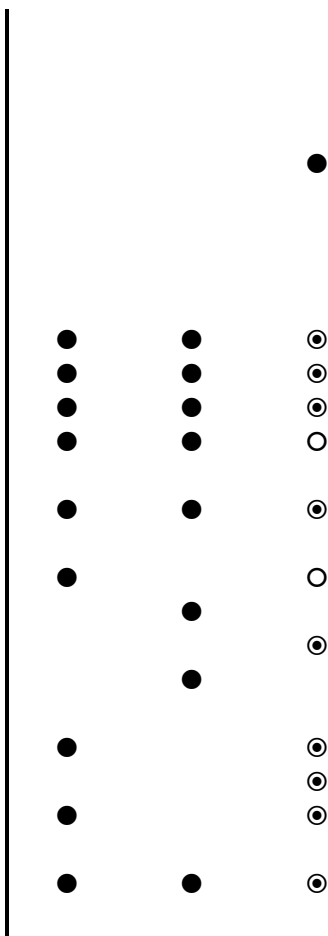

Supplement: M900191-MCP200_3.pdf [file M900191-MCP200_3.pdf]
