# Supplementary material
Source: PubMed Central journal article supplement (PMC2773714)
Supplement: M900191-MCP200_1.pdf [file M900191-MCP200_1.pdf]

## Supplementary Fig. S1

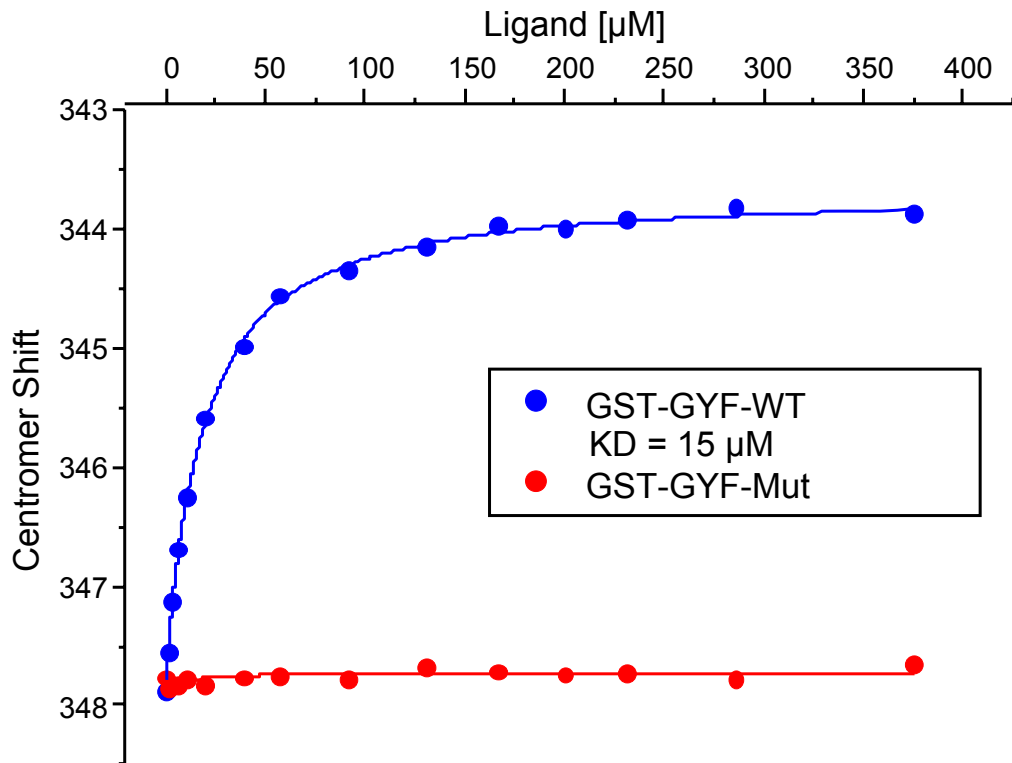

Supplementary Figure S1. Fluorescence titration of CD2BP2 GYF domain constructs with a proline-rich peptide. Fluorescence titration experiments were performed with 3  $\mu\text{M}$  samples of GST-tagged CD2BP2 constructs in PBS at 25  $^{\circ}\text{C}$ . Increasing amounts of the peptide Ac-PMGRGAPPPGMMGPPPGMRPPM-NH<sub>2</sub> (Ligand) were added to GST-GYF WT or GST-GYF W8R Y33A and fluorescence of these constructs was excited at 280 nm on a Perkin LS-50B fluorimeter (Perkin Elmer, Wellesley, Massachusetts, USA). Emission spectra were recorded between 300 and 400 nm. Centroid shifts were calculated using the software SpecWin (a kind gift of Sebastian Modersohn). The position of the centroid during titration was plotted against the ligand concentration and a dissociation constant was calculated for the wt domain assuming a two-state binding model.
