# Supplementary material
Source: PubMed Central journal article supplement (PMC2773714)
Supplement: M900191-MCP200_2.pdf [file M900191-MCP200_2.pdf]

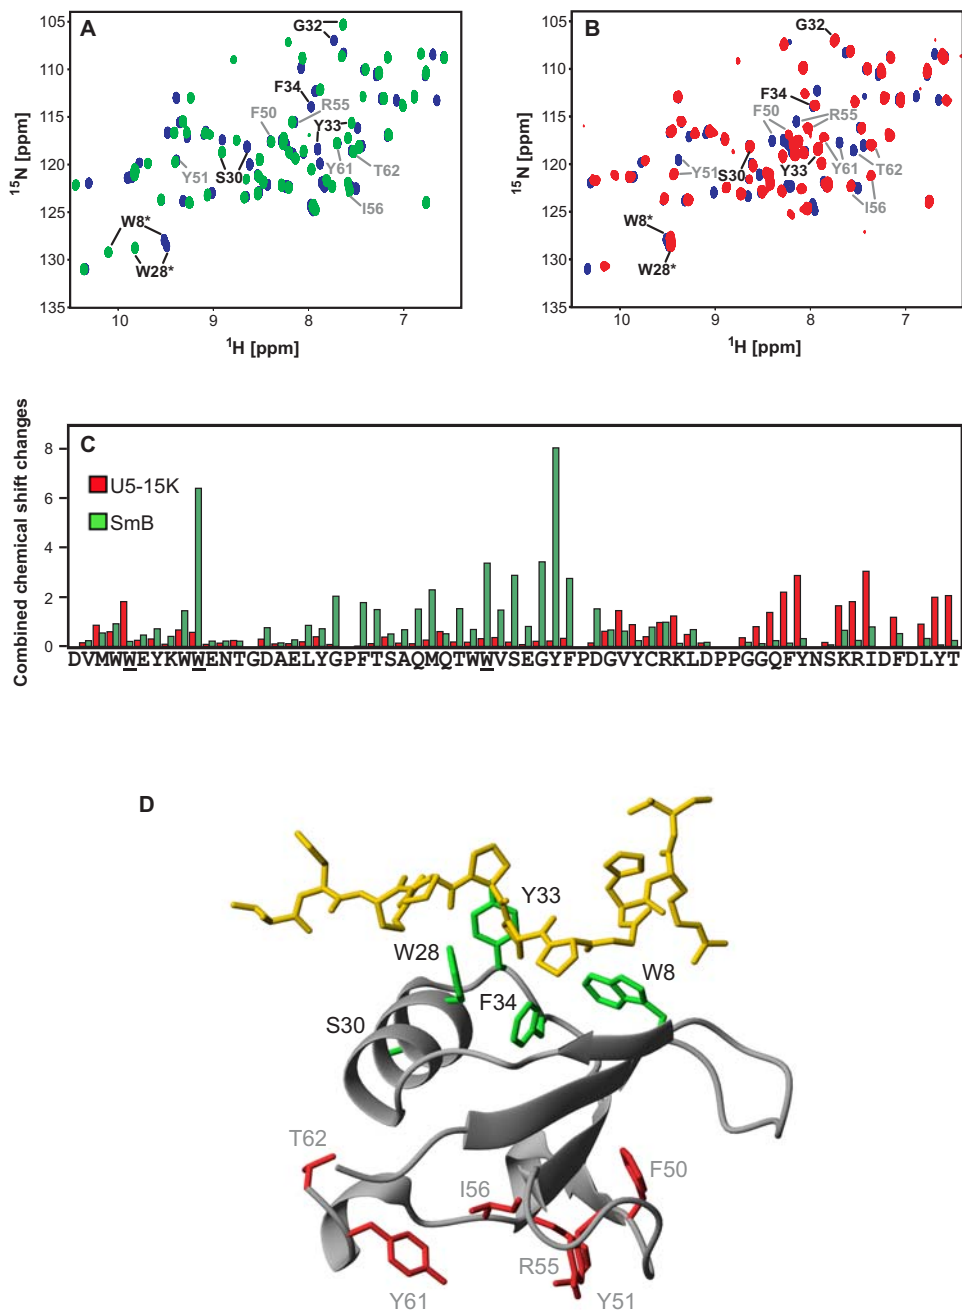

Supplementary Figure S2. HSQC spectra of GYF domain alone (blue) and in the presence of a 5 fold excess of SmB peptide (green, A) or equal amounts of U5-15K (red, B). The six peaks with strongest chemical shift changes upon addition of SmB peptide or U5-15K are labelled according to residue type and number in black and grey, respectively. The resonance of phenylalanine 30 broadens upon peptide addition and is below the threshold for display. (C) The combined chemical shift changes of each assigned residue upon ligand addition, depicted in A and B are presented as histogram. Prolines are included for completeness. The side-chains of tryptophan 8 and 28 are indicated by W. (D) The side-chains of the six residues with strongest combined chemical shift changes upon addition of SmB peptide or U5-15K are depicted in green and red, respectively on the structure of CD2BP2-GYF in complex with the CD2 peptide and labelled as in (A). The domain is shown in grey, the ligand in yellow. Hydrogen atoms are omitted and hence glycine 32 cannot be seen.
