# Supplementary material
Source: PubMed Central journal article supplement (PMC2773714)
Supplement: M900191-MCP200_4.pdf [file M900191-MCP200_4.pdf]

Table S2

Additional proteins in CD2BP2/52K-GYF or U5-15K precipitates. The list comprises all remaining proteins identified by mass spectrometry not shown in Table S1. Columns and symbols are as in Table S1. As for Table S1, for each protein in the list the accession number, the number of unique peptides and the sequence coverage (in %) are given in Supplementary Tables S6 to S8, corresponding to the three pulldown experiments GYF +/- PD1, GYF/GYF-mutant and U5-15K +/- PD1.

| Protein     | GYF +/-PD1 | GYF / GYF-mutant | U5 15K +/- PD1 |                       |   |     |
|-------------|------------|------------------|----------------|-----------------------|---|-----|
|             |            |                  |                | CALU_HUMAN            |   | ○ ◎ |
|             |            |                  |                | CALX_HUMAN            |   | ○   |
|             |            |                  |                | CASPE_HUMAN           |   | ○   |
|             |            |                  |                | CATD_HUMAN            | ○ |     |
| 1433F_HUMAN | ○          |                  |                | C2D1A_HUMAN           | ● | ●   |
| 4F2_HUMAN   |            | ○                | ○              | CD2B2_HUMAN (endogen) | ● | ●   |
| ABCF1_HUMAN |            | ●                |                | CH60_HUMAN            | ● | ◎ ◎ |
| ACL6A_HUMAN | ●          | ●                |                | CLH1_HUMAN            |   | ○   |
| ACLY_HUMAN  |            |                  | ◎              | CLUS_HUMAN            |   | ○   |
| ACOT9_HUMAN |            |                  | ○              | CO4A2_HUMAN           | ● | ●   |
| ADT3_HUMAN  |            |                  | ●              | COCA1_HUMAN           | ● | ●   |
| AIP_HUMAN   | ●          |                  |                | COF1_HUMAN            |   | ◎   |
| ALBU_HUMAN  | ○          |                  | ○              | COX2_HUMAN            |   | ○   |
| ANXA1_HUMAN | ○          |                  |                | CPSF2_HUMAN           | ● |     |
| AP2M1_HUMAN | ●          |                  |                | CPSF5_HUMAN           | ● | ●   |
| APOD_HUMAN  |            |                  | ○              | CPSF6_HUMAN           | ● | ●   |
| ARF4_HUMAN  |            | ◎                | ○              | CPSF7_HUMAN           | ● | ●   |
| ARHG2_HUMAN |            |                  | ◎              | CPSM_HUMAN            | ● | ◎ ◎ |
| ARHG7_HUMAN |            |                  | ◎              | MED14_HUMAN           | ● |     |
| ARI1A_HUMAN | ●          | ●                |                | CSK21_HUMAN           | ● |     |
| ARI1B_HUMAN | ●          |                  |                | CSKI2_HUMAN           | ● |     |
| ASSY_HUMAN  | ●          | ●                | ○              | CSRP2_HUMAN           |   | ◎   |
| ATD3A_HUMAN | ●          | ●                | ○              | CT004_HUMAN           | ● |     |
| ATD3B_HUMAN |            | ●                |                | CTGE5_HUMAN           | ● | ●   |
| ATN1_HUMAN  | ●          | ●                | 3              | CUL1_HUMAN            |   | ○   |
| ATP5H_HUMAN | ●          |                  | ○              | CYTA_HUMAN            |   | ○   |
| ATPA_HUMAN  | ●          | ◎                | ○              | DCD_HUMAN             | ○ | ○ ○ |
| ATPB_HUMAN  | ●          | ◎                | ○              | DDB1_HUMAN            |   | ○ ◎ |
| ATPG_HUMAN  |            | ◎                |                | DDX3Y_HUMAN           |   | ● ○ |
| ATPO_HUMAN  |            |                  | ○              | DDX47_HUMAN           | ● |     |
| ATX2_HUMAN  | ●          | ●                |                | IF4A3_HUMAN           | ● |     |
| ATX2L_HUMAN | ●          | ●                |                | DEK_HUMAN             |   | ●   |
| BCL7A_HUMAN |            | ●                |                | DESP_HUMAN            | ◎ | ○ ◎ |
| BCLF1_HUMAN | ●          |                  |                | CBR3_HUMAN            |   | ●   |
| C4BPA_HUMAN |            |                  | ◎              | CBR1_HUMAN            | ◎ | ◎ ◎ |
| RPAP2_HUMAN |            |                  | ●              | DHX29_HUMAN           | ● |     |
| CALM_HUMAN  |            | ○                | ○              | DHX30_HUMAN           | ● | ○   |



|             |   |   |   |             |   |   |   |
|-------------|---|---|---|-------------|---|---|---|
| MRLC3_HUMAN |   | ⊙ | ⊙ | RL22L_HUMAN |   | ○ |   |
| MOV10_HUMAN | ● | ● | ○ | RL23_HUMAN  | ● | ⊙ |   |
| MPCP_HUMAN  |   |   | ○ | RL23A_HUMAN | ● | ● | ⊙ |
| MYCB2_HUMAN |   |   | ○ | RL24_HUMAN  | ● | ● | ⊙ |
| MYH9_HUMAN  | ⊙ | ○ | ⊙ | RL26_HUMAN  | ● | ● | ⊙ |
| MYL6_HUMAN  | ⊙ | ○ | ⊙ | RL26L_HUMAN |   | ● |   |
| MYO1C_HUMAN |   | ○ |   | RL27_HUMAN  | ● | ● | ⊙ |
| MYO1E_HUMAN | ● | ● |   | RL27A_HUMAN | ● | ● | ⊙ |
| NH2L1_HUMAN | ● |   |   | RL28_HUMAN  | ● | ● | ⊙ |
| NUCL_HUMAN  | ● | ● | ⊙ | RL29_HUMAN  |   | ● | ⊙ |
| NUFP2_HUMAN | ● | ● |   | RL3_HUMAN   | ● | ● | ⊙ |
| P80C_HUMAN  |   | ● |   | RL30_HUMAN  | ● | ● | ⊙ |
| PABP4_HUMAN | ● | ● | ⊙ | RL31_HUMAN  | ● | ● | ⊙ |
| PAIRB_HUMAN |   | ● | ○ | RL32_HUMAN  |   | ● | ⊙ |
| PERM_HUMAN  | ○ |   |   | RL34_HUMAN  | ● |   | ⊙ |
| PHB2_HUMAN  |   | ⊙ |   | RL35_HUMAN  | ● | ● | ⊙ |
| PIP_HUMAN   |   |   | ○ | RL35A_HUMAN | ● | ● | ⊙ |
| PKP1_HUMAN  | ○ |   |   | RL36_HUMAN  | ● | ● | ○ |
| PKP2_HUMAN  |   |   | ⊙ | RL37A_HUMAN | ● |   | ⊙ |
| PKP3_HUMAN  |   |   | ⊙ | RL38_HUMAN  | ● | ● | ○ |
| PLAK_HUMAN  | ○ |   | ○ | RL4_HUMAN   | ● | ● | ⊙ |
| PLEC1_HUMAN | ● | ⊙ | ⊙ | RL5_HUMAN   | ● | ● |   |
| PLOD1_HUMAN | ● | ● | ⊙ | RL6_HUMAN   | ● | ● |   |
| PLOD2_HUMAN |   |   | ⊙ | RL7_HUMAN   |   |   | ⊙ |
| PLOD3_HUMAN | ● | ● |   | RL7A_HUMAN  |   |   | ⊙ |
| MED1_HUMAN  | ● |   |   | RL8_HUMAN   |   |   | ⊙ |
| PRDX1_HUMAN | ○ |   | ○ | RLA0_HUMAN  | ● | ● |   |
| RBM33_HUMAN | ● | ● |   | RLA1_HUMAN  | ● |   | ⊙ |
| PSMD3_HUMAN |   | ● |   | RLA2_HUMAN  | ● | ● | ⊙ |
| PTN11_HUMAN |   |   | ○ | RM12_HUMAN  |   | ● |   |
| PYR1_HUMAN  |   |   | ○ | RBM39_HUMAN | ● |   |   |
| RAPH1_HUMAN | ● | ● |   | RPAC1_HUMAN | ● |   |   |
| RBM16_HUMAN | ● |   | 1 | RPB1_HUMAN  |   |   | ● |
| RBM3_HUMAN  |   |   | ⊙ | RPB2_HUMAN  |   |   | ● |
| RBM4B_HUMAN | ● |   |   | RS10_HUMAN  | ● | ● | ⊙ |
| RBP56_HUMAN | ● | ● | ○ | RS11_HUMAN  | ● | ● | ⊙ |
| RCC2_HUMAN  |   |   | ⊙ | RS14_HUMAN  | ● | ● | ⊙ |
| RCN1_HUMAN  |   |   | ○ | RS15_HUMAN  | ● | ● | ⊙ |
| REQU_HUMAN  | ● | ● |   | RS15A_HUMAN | ● | ● | ⊙ |
| RIOK1_HUMAN |   | ● |   | RS16_HUMAN  | ● | ● | ⊙ |
| RL10A_HUMAN |   |   | ⊙ | RS23_HUMAN  | ● | ● | ⊙ |
| RL11_HUMAN  | ● | ● | ⊙ | RS24_HUMAN  |   | ● |   |
| RL12_HUMAN  | ● | ● | ⊙ | RS26_HUMAN  | ● | ● | ⊙ |
| RL13_HUMAN  |   |   | ⊙ | RS27_HUMAN  | ● | ● | ⊙ |
| RL13A_HUMAN |   |   | ⊙ | RS27A_HUMAN |   | ● |   |
| RL17_HUMAN  | ● | ● | ⊙ | RS27L_HUMAN |   |   | ⊙ |
| RL18A_HUMAN | ● |   | ⊙ | RS28_HUMAN  | ● | ● | ○ |
| RL19_HUMAN  |   |   | ⊙ | RS29_HUMAN  | ● | ● | ⊙ |
| RL21_HUMAN  | ● | ● | ⊙ | RS30_HUMAN  |   | ● |   |
| RL22_HUMAN  | ● | ● | ⊙ | RS4X_HUMAN  |   |   | ⊙ |

|             |   |   |   |             |   |   |   |   |
|-------------|---|---|---|-------------|---|---|---|---|
| RS8_HUMAN   |   |   | ⊙ | TBB2C,      | ● | ⊙ | ⊙ |   |
| RS9_HUMAN   |   |   | ⊙ | TBB5_HUMAN  |   |   |   |   |
| RT17_HUMAN  |   |   | ○ | TBB2C_HUMAN | ● |   | ⊙ |   |
| RT27_HUMAN  | ● |   |   | TBL2_HUMAN  | ● |   |   |   |
| RT28_HUMAN  | ● | ● |   | TCP4_HUMAN  | ● | ● | ⊙ |   |
| RT29_HUMAN  | ● |   |   | TCPA_HUMAN  |   |   | ○ |   |
| RXRB_HUMAN  | ● |   |   | TCPG_HUMAN  | ● |   | ○ |   |
| S10A4_HUMAN |   |   | ○ | TFG_HUMAN   | ● | ⊙ | ⊙ |   |
| SAFB1_HUMAN |   |   | ⊙ | TFR1_HUMAN  |   |   | ○ |   |
| KHDR1_HUMAN | ● | ● | ⊙ | THIO_HUMAN  | ○ | ⊙ | ⊙ |   |
| SEC13_HUMAN | ● |   |   | TIF1B_HUMAN |   |   | ⊙ |   |
| SEMG1_HUMAN | ○ |   |   | TRI33_HUMAN | ● |   |   |   |
| SERA_HUMAN  | ● | ○ | ⊙ | TIM14_HUMAN |   |   | ○ |   |
| SFR15_HUMAN | ● | ● |   | TM109_HUMAN | ● | ● |   |   |
| SFRS8_HUMAN | ● |   |   | TMEDA_HUMAN |   |   | ○ |   |
| SKP1_HUMAN  |   |   | ⊙ | TMOD3_HUMAN |   | ○ |   |   |
| SMC4_HUMAN  | ● |   |   | TPM4_HUMAN  |   |   | ○ |   |
| SMCA2_HUMAN | ● | ● |   | TR150_HUMAN | ● |   |   |   |
| SMCA4_HUMAN | ● | ● |   | TRFL_HUMAN  | ○ |   |   |   |
| SMCE1_HUMAN | ● | ● |   | TRI25_HUMAN | ● | ● | ⊙ |   |
| SMN_HUMAN   | ● | ● |   | TSSC4_HUMAN |   |   | ○ |   |
| SMRC1_HUMAN | ● | ● |   | UBIQ_HUMAN  |   | ○ |   |   |
| SMRC2_HUMAN | ● | ● |   | UBP2L_HUMAN | ● | ● |   |   |
| SMRD1_HUMAN | ● | ● |   | QCR8,       |   |   |   | ⊙ |
| SMRD2_HUMAN | ● | ● |   | QCR7_HUMAN  |   |   |   | ○ |
| SMRD3_HUMAN | ● | ● |   | USP9X_HUMAN |   | ○ | ⊙ |   |
| SNF5_HUMAN  | ● | ● |   | VIME_HUMAN  |   |   |   |   |
| SPT16_HUMAN | ● |   |   | WIPF1_HUMAN | ● | ● |   |   |
| SPTA2_HUMAN |   | ○ |   | WASL_HUMAN  | ● | ● |   |   |
| SRC8_HUMAN  |   |   | ⊙ | WDR23_HUMAN |   |   |   | ⊙ |
| SRP09_HUMAN | ● | ● | ⊙ | WDR33_HUMAN | ● |   |   |   |
| SRP14_HUMAN | ● | ● | ⊙ | WDR5_HUMAN  | ● |   |   |   |
| SSBP3_HUMAN | ● | ● |   | WDR61_HUMAN |   | ● |   |   |
| SSBP4_HUMAN | ● | ● |   | WDR68_HUMAN | ● | ● |   |   |
| SSRP1_HUMAN | ● | ● |   | WIPF2_HUMAN | ● | ● |   |   |
| STRAP_HUMAN | ● | ● |   | WRIP1_HUMAN | ● | ● |   |   |
| SYEP_HUMAN  | ● |   | ○ | YLPM1_HUMAN | ● |   |   | 3 |
| SYIC_HUMAN  |   |   | ○ | YTHD2_HUMAN | ● | ● |   |   |
| TBA4A_HUMAN |   | ⊙ | ○ | ZCCHV_HUMAN |   | ● | ⊙ |   |
| TBA1B_HUMAN | ● | ⊙ | ⊙ | ZN598_HUMAN | ● | ● |   | 2 |
