# Supplementary material
Source: PubMed Central journal article supplement (PMC2773714)
Supplement: M900191-MCP200_5.pdf [file M900191-MCP200_5.pdf]

GEKIPASKMQEHMRIGLLDPRWLEQRDRSIREKQSDDEVYAPGLDIESSLKQLAERRTDIFGVEETAIGKKGIEEEIQKPEEKVTWGDHSGSMARTQQAQANITLQEQIEAIHAKGLVPEDDTEKIKGSPKNEIPQQP  
 PPPSSATNIPSSAPPITVPRPPTMPPVRTTVVSAVPMRPPMASVVRLEPPGVSIAVPMPPHAPRINNVPMPPSAPPIMAPRPPMIVPTAFVPAPPVAPVAPAMPPVHPPPPMEDEPTSKLKTEDSLMPEEFL  
 RRNGKPVSIKQVQVPMQDKTEWKLNGQVLVFTLPLTDQVSVIKVHIHEATGMPAGKQKQLQYEGIFKSDNSLAYYNNMANGAVIHLALKERGRKK

**SF3a66 (SF3A2\_HUMAN)**

MDFQHRPGGKTGSGGVASSSESNRRRERLRLQLALETIDINKDPYFMKNHLSYECKLCLTLHNNESYLAHTQGKKHQTNLARRAAKEAKEAPAQPAPEKVVEVKKFVKIGRPGYKVTQRDSEMGGQSLLFQID  
 YPEIAEGIMPRHRFMSAYEQRIEPDRRWQYLLMAAEPEYETIAFKVPSREIDKAEGKFWTHWNRETKQFFLQFHFMEKPPAPSLPAGPPGVK RPPPLMNGLPPRPLPESLPPPPPGGLPLPPMPTGPAPS  
 PPGPLQLPPAPAGVHPPAPVHPPASGVHPPAGVHPPAGVHPPAGVHPPPTSGVHPPAGVHPPAPGVHPPAPGVHPPASGVHPPAQAGVHPPAAPAVHPQAPGVHPPAPGMHPQAPGV  
 HPQPPGVHPSAPGVHPQPPGVHPSNPGVHPPPTMPMPLRPPLPSEGPGNIPPPPPTN

**SF3b145 (SF3B2\_HUMAN)**

MAPGAAQELQAKLAEIGAPIQGNREELVERLQSYTRQTGIVLNRPVLRGEGDGKAA PPPMSAQLPGI PMPPLPLGLPPLQ P P P P P P P P P P G L G L G F P M A H P P N L G P P P L R V G E P V A L S E E E R L K L A Q Q Q A A L L M Q Q  
 E E R A K Q Q Q D H S L K E H E L L E Q Q K R A A V L L E Q E R Q Q E I A K M G T P V P R P P Q D M G Q I G V R T P L G P R V A A P V G P V G P T P T V L P M G A P V P R P R G P P P P G D E N R E M D D P S V G P K I P Q A L E K I L Q L K E S R Q E E M N S Q Q E E E  
 M E T D A R S S L G Q S A S E T E E D T V S V S K K E N R K R R N R K K K K Q R V R G V S S E S S G D R E K D S T R S R G S D S P A A D V E I E Y V T E E P E I Y E P N F I F F K R I F E A F K L T D D V K K E K E K E P E K L D K L E N S A A P K K K G F E E E H K D S D D  
 D S S D D E Q E K K P E A P K L S K K K L R R M N R F T V A E L K Q L V A R P D V E M H D V T A Q D P K L L V H L K A T R N S V P V P R H W C F K R K Y L Q G K R G I E K P P F E L P D F I K R T G I Q E M R E A L Q E K E E Q K T M K S K M R E K V R P K M G I D I D Y Q L  
 H D A F F K W Q T K P K L T I H G D L Y Y E G K E F E T R L K E K K P G D L S D E L R I S L G M P V G P N A H K V P P P W L I A M Q R Y G P P P S Y P N L K I P G L N S P I P E S C S F G Y H A G G W G K P P V D E T G K P L Y G D V F G T N A A E F Q T K T E E E E I D R T P W G  
 E L E P S D E E S S E E E E E S D E D K P D E T G F I T P A D S G L I T P G G F S S V P A G M T P E L I E L R K K K I E E A M D G S E T P Q L F T V L P E K R T A T V G G A M M G S T H I Y D M S T V M S R K G P A P E L Q G V E V A L A P E E L E L D P M A M T Q K Y E E H V  
 R E Q Q A Q V E K E D F S D M V A E H A A K Q K K R K A Q P Q D S R G S K K Y K E F K F

**SF3b49 (SF3B4\_HUMAN)**

MAAGPISERNQDATVYVGGGLDEKVESELLWELFLQAGPVVNTMHPKDRVTGQHQYGFVFLSEEDADYAIKIMMIKLYGKPIRVNKAHAHKNLVDGANIFIGNLDPEIDEKLLYDTFSAGVILQTPKIMRDPDTGN  
 SKGYAFINFAFDASDAIEAMNGQYLCNRPITVSYAFKKDSKGERHGSAAERLLAAQNLPSQADRPHQLFADA P P P P S A P N P V S S L G S G L P P P G M P P P G S F P P P V P P P G A L P P G I P P A M P P P M P P G A A G H G P P S  
 A G T P G A G H P G H G H S H P P P P G G M P H P G M S Q M Q L A H H G P H G L G H P H A G P P G S G G Q P P P R P P P G M P H P G P P P M G M P P R G P P F G S P M G H P G M P P H G M R G P P L M P P H G Y T G P P R P P Y G Y Q R G P L P P P R P T  
 P R P P V P P R G P L R G L P L Q

**SmB' (RSMB\_HUMAN)**

MTVGKSSKMLQHIDYRMRICLQDGRIFIGTFKAFDKHMNLILCDCDEFRIKIKPKNSKQAEREEKRVLGLVLLRGENLVSMTVEGPPPKDTGIARVPLAGAAGGGPIGRAAGRGPAGV P M P Q A P A G L A G P V R V G V G G P S  
 Q Q V M T P Q G R G T V A A A A A A T A S I A G A P T Q Y P P G R G G P P P M M G R G A P P P G M M G P P P G M R P P M G P P M G I P P G R G T P M G M P P G M R P P P G M R G P P P G M R P P P R P

**U1-A (SNRPA\_HUMAN)**

MAVPETRPNHTIYINNLNEKIKKDELKKSLYAIFSQFGQILDILVSRSLKMRGQAFVIFKEVSSATNALRSMGGPFYDKPMRIQYAKTSDIIAKMGKTFVERDRKREKRKPKSQETPATKAVQGGGATPVVGAVQGPV  
 PGMPPMTQAPRIMHHPGQPPYMP P P G M I P P P G L A P G Q I P P G A M P P Q Q L M P G Q M P P A Q L S E N P P N H I L F T L N P E E T N E L M L S M L F N Q F P G F K E V R L V P G R H D I A F V E F D N E V Q A G A A R D A L Q G F K I T Q N N A M K I S  
 F A K K

**U1-C (RU1C\_HUMAN)**

MPKFYCDYCDTYLTHDSVSRKTHCSGRKHENKVDYQKWMEEQAQSLIDKTTAAFGQGKIPPTPFSAPPAGAMI P P P P S L P G P P R P G M M P A P H M G G P P M M M G P P P P G M M P V G A P G M R P P M G G H M P M  
 M P G P P M M R P P A R P M M V P T R P G M T R P D R

**ZN207 (ZN207\_HUMAN)**

MGRKKKKLQKPWCWYCNRFDDKELIQHQKAKHFKCHICHKLYTGPLAIHCQMVKHETIDAVPNAIPGRDIELEIYGMGIEPKDMDERRRLEQKTQESQKKKQQDDSDYDSDSASTSFQPQVPVQPPQG  
 YIIPMAQPLPPVPGAPGM P P G I P P L M P G V P P L M P G M P P V M P G M P P G M M P P G G I P P L M P G M P P G M P P P V P R P G I P P M T Q A Q A V S A P G I L N R P P A P T A T V P A P Q P P V T K P L F P S A G Q M G T P V T S S S T A S  
 S N S E L S A S S K A L F P S T A Q A A V Q G P V G T D F K P L N S T A T T T E P P K P T F P A Y T Q S T A S T T T N N S T A A K P A A S I T S K P A T L T T T S A T S K L I H P D E D I S L E E R A Q L P K Y Q R N L P R P G Q A P I G N P P V G I P G M M P P Q G I P  
 Q Q Q G M R P P M P P H G Q Y G G H H Q G M P G Y L P G A M P P Y G Q G P P M V P P Y Q G G P P R P P M G M R P P V M S Q G G R Y
