# Supplementary material
Source: PubMed Central journal article supplement (PMC2773714)
Supplement: M900191-MCP200_6.pdf [file M900191-MCP200_6.pdf]

Table S4: MS quantification results for the proline-rich sequence hubs as defined in the results section (Table 2). The two experiments where the PRS was dysfunctional were used for comparison (pep. comp. and W8RY33A). N.d. relates to MS spectra where <sup>12</sup>C peptides were below noise levels while <sup>13</sup>C peak intensities were at least >10 above noise levels. StDev was obtained by MS Quant.

| protein | SwissProt ID | Mass [Da] | pulldown  | band | #:peptides | #:C13 | total score | % seq. coverage | quantified peptides | enrichment factor | StDev* |
|---------|--------------|-----------|-----------|------|------------|-------|-------------|-----------------|---------------------|-------------------|--------|
| CA150   | TCRG1_HUMAN  | 123882    | pep comp. | 14   | 51         | 51    | 2520        | 31              | 5                   | 36                | 9      |
| CA150   | TCRG1_HUMAN  | 123882    | W8RY33A   | 44   | 75         | 75    | 3556        | 42              | 5                   | 46                | 14     |
| NpwBP   | WBP11_HUMAN  | 69954     | pep comp. | 22   | 40         | 40    | 2361        | 36              | 4                   | 30                | 5      |
| NpwBP   | WBP11_HUMAN  | 69954     | W8RY33A   | 39   | 45         | 45    | 2194        | 40              | 5                   | 36                | 11     |
| PSF     | SFPQ_HUMAN   | 76102     | pep comp. | 21   | 67         | 67    | 2751        | 46              | 4                   | 20                | 5      |
| PSF     | SFPQ_HUMAN   | 76102     | W8RY33A   | 40   | 73         | 72    | 3026        | 50              | 4                   | 13                | 4      |
| SF1     | SF01_HUMAN   | 68155     | pep comp. | 25   | 9          | 9     | 419         | 12              | §                   | >10               |        |
| SF1     | SF01_HUMAN   | 68155     | W8RY33A   | 38   | 8          | 8     | 425         | 13              | 2                   | 26                | 5      |
| SF3a120 | SF3A1_HUMAN  | 88831     | pep comp. | 19   | 48         | 48    | 2422        | 46              | 5                   | 36                | 8      |
| SF3a120 | SF3A1_HUMAN  | 88831     | W8RY33A   | 41   | 50         | 50    | 2480        | 45              | n.d.                | >10               |        |
| SF3a66  | SF3A2_HUMAN  | 49224     | pep comp. | 31   | 18         | 18    | 704         | 28              | n.d.                | >10               |        |
| SF3a66  | SF3A2_HUMAN  | 49224     | W8RY33A   | 32   | 15         | 15    | 559         | 28              | 2                   | 23                | 4      |
| SF3b145 | SF3B2_HUMAN  | 97596     | pep comp. | 16   | 56         | 56    | 3341        | 58              | 6                   | 40                | 17     |
| SF3b145 | SF3B2_HUMAN  | 97596     | W8RY33A   | 43   | 72         | 72    | 3673        | 62              | 4                   | 33                | 7      |
| SF3b49  | SF3B4_HUMAN  | 44357     | pep comp. | 39   | 5          | 5     | 363         | 19              | #                   | >10               |        |
| SF3b49  | SF3B4_HUMAN  | 44357     | W8RY33A   | 28   | 6          | 6     | 233         | 11              | §                   | >10               |        |
| SmB'    | RSMB_HUMAN   | 24594     | pep comp. | 47   | 1          | 1     | 59          | 3               | #                   | >10               |        |
| U1-A    | SNRPA_HUMAN  | 31128     | W8RY33A   | 18   | 15         | 15    | 639         | 46              | 2                   | 30                | 11     |
| U1-C    | RU1C_HUMAN   | 17381     | pep comp. | 47   | 4          | 4     | 170         | 18              | §                   | >10               |        |
| U1-C    | RU1C_HUMAN   | 17381     | W8RY33A   | 15   | 4          | 4     | 202         | 18              | §                   | >10               |        |
| ZNF207  | ZN207_HUMAN  | 50717     | pep comp. | 33   | 7          | 7     | 504         | 13              | §                   | >10               |        |
| ZNF207  | ZN207_HUMAN  | 50717     | W8RY33A   | 30   | 11         | 11    | 640         | 18              | §                   | >10               |        |
