# Supplementary material
Source: PubMed Central journal article supplement (PMC2773714)
Supplement: M900191-MCP200_7.pdf [file M900191-MCP200_7.pdf]

Table S5

Proline-rich peptide ligands for profilin, WW, EVH1 & SH3 domain classes (Fig. 4a). Z indicates phosphotyrosine.

| Position | Sequence                  | Protein Name  | PRD class    | Accession Number |
|----------|---------------------------|---------------|--------------|------------------|
| 1        | PPPPPPPPPPPPPPPPPPPPPP    |               | Profilin     |                  |
| 2        | PPGPPRGGPPRRPPGPPRGPPR    | NPWBP (WBP11) |              | WBP11_HUMAN      |
| 3        | LPPAPGSTVPGTTPPRYNTRLRLDR | gamma-EnaC    | WW-ClassI    | SCNNG_RAT        |
| 4        | LPPAPGSTVPGTTPPRZNTLRLDR  | gamma-EnaC    | WW-ClassI    | SCNNG_RAT        |
| 5        | DQQTLPVPGTTPPNYDSLRLQPLD  | EnaC-beta     | WW-ClassI    | SCNNB_RAT        |
| 6        | DQQTLPVPGTTPPNZDSLRLQPLD  | EnaC-beta     | WW-ClassI    | SCNNB_RAT        |
| 7        | SEQALVPGTTPPNYDSLRLQPLD   | EnaC-beta     | WW-ClassI    | SCNNB_HUMAN      |
| 8        | SEQALVPGTTPPNZDSLRLQPLD   | EnaC-beta     | WW-ClassI    | SCNNB_HUMAN      |
| 9        | EDVVHHPGTTPPPYTVGPGYPWTT  | WBP-1         | WW-ClassII   | WBP1_MOUSE       |
| 10       | EDVVHHPGTTPPPZTVGPGYPWTT  | WBP-1         | WW-ClassII   | WBP1_MOUSE       |
| 11       | EETLPLPPPAPPLPPPLLHYQTS   | WBP-3         | WW-ClassII   | FMNL3_MOUSE      |
| 12       | LPSPPPLTPPVSPPPPLPPPSTSP  | WBP-7         | WW-ClassII   | WBP7_MOUSE       |
| 13       | GRGTPMGMPPPGMRPPPPGMRGLL  | SmB           | WW-ClassIII  | RSMB_HUMAN       |
| 14       | PPPPPPGSAGMMYAPPPPPPPMD   | SF1-HL1       | WW-ClassIII  | SF01_HUMAN       |
| 15       | FVTMMGMGVAGMPPFGMPAPPPP   | SF1-HL1       | WW-ClassIII  | SF01_HUMAN       |
| 16       | CSVTFSPPEQLTPVTDLAVGFSNL  | Cdc25         | WW-ClassIV   | MPI1A_XENLA      |
| 17       | EVNASDFPPPTDEELRLALPETP   | ActA-1        | EVH1-ClassI  | ACTA_LISMO       |
| 18       | TSEPSSEFPPPPTDEELRLALPE   | ActA-1        | EVH1-ClassI  | ACTA_LISMO       |
| 19       | GVGVTSLRPPHHFSPPCFVAALP   | Ryr           | EVH1-ClassII | RYR1_HUMAN       |
| 20       | PETGDLNPPKFKFRDCLFKLCPMN  | IP3R          | EVH1-ClassII | ITPR1_HUMAN      |
| 21       | QSAPVKQPPPLAPQSPQGGVMGGS  | Yap65         | SH3-1R       | YAP1_HUMAN       |
| 22       | ISTEWNERPAPALPKPKPTTV     | PI3K p85      | SH3-1R       | P85A_HUMAN       |
| 23       | SPPTPKRPPRPLVAPGSSKTEA    | PI3K p85      | SH3-1R       | P85A_HUMAN       |
| 24       | PSEKVAIIRTTPKSPATPKQLRL   | MAP-2         | SH3-1R       | MAP2_HUMAN       |
| 25       | PAGSALGGAPPVPSRPGASDPDFG  | dynamnin      | SH3-2R       | DYN1_HUMAN       |
| 26       | TQEMDLHSIAGPPVPRQSTSQLI   | mSOS1         | SH3-2R       | SOS1_MOUSE       |
| 27       | FSMAPQASLPPVPPRLDLLPQRVC  | c-Cbl         | SH3-2R       | CBL_HUMAN        |
| 28       | SVGAESRPQRRPLPCTPGDCPSRD  | c-Cbl         | SH3-1K       | CBL_HUMAN        |
| 29       | PSSRLGDSWLPFRPIPKVPSAPSS  | c-Cbl         | SH3-1K       | CBL_HUMAN        |
| 30       | ATVTRGVPPPTVRGAPAPRARTA   | Sam68         | SH3-1K       | SAM68_HUMAN      |
| 31       | RGAVSTLLQAPLPTKTRTSRRAA   | Abl (Hs)      | SH3-2K       | ABL1_HUMAN       |
| 32       | APTMPGPGYGGPPVPPQQQAENP   | Ena (Dm)      | SH3-1@       | ENA_DROME        |
| 33       | LVGTSRLRAPTMPPPLPPVPPQPAR | 3BP (Mm)      | SH3-1@       | 3BP1_MOUSE       |
| 34       | PMFDDSPPPPPPVYDEDEAAV     | E3b1/Abi-1    | SH3-2D       | ABI_MOUSE        |
| 35       | GSPKNGKLIIPPVDYLPDNRTWSE  | RN-tre        | SH3-2D       | US6NL_HUMAN      |
| 36       | PVPSLPIRPSRAPSRTPGPPSAQS  | Synaptojanin  | SH3-X        | SYNJ1_HUMAN      |
| 37       | PAGYSTARPPTIPPRAGVISAPQSH | Synaptojanin  | SH3-X        | SYNJ1_HUMAN      |
| 38       | QPLEPKRPPPRPVAPPTRPAPPQ   | Synaptojanin  | SH3-X        | SYNJ1_HUMAN      |
| 39       | PAPPQRPPPPSGARSPAPTRKEFG  | Synaptojanin  | SH3-X        | SYNJ1_HUMAN      |
| 40       | LETPPQPPPRSRSSHSLPSEASSQ  | Synaptojanin  | SH3-X        | SYNJ1_HUMAN      |
