# Supplementary material
Source: PubMed Central journal article supplement (PMC2773714)
Supplement: M900191-MCP200_9.pdf [file M900191-MCP200_9.pdf]

Supplementary Table S7

Accession number, SDS-PAGE excised band number, total score, the numbers of <sup>13</sup>C-labeled and total unique peptides as well as the sequence coverage are listed for all identified proteins of the GYF domain/GYF domain mutant (W8R/Y33A) pulldown experiment.

| protein            | band | total score | #:C13-peptides/#:all peptides* | sequence coverage in % |
|--------------------|------|-------------|--------------------------------|------------------------|
| 4F2_HUMAN          | 38   | 249         | 0/4                            | 8                      |
| ABCF1_HUMAN        | 42   | 156         | 3/3                            | 3                      |
| ACL6A_HUMAN        | 27   | 850         | 16/16                          | 28                     |
| ACTB_HUMAN         | 25   | 1487        | 15/44                          | 54                     |
| ANM5_HUMAN         | 36   | 764         | 17/17                          | 20                     |
| ANXA2_HUMAN        | 21   | 458         | 1/11                           | 35                     |
| ARF4_HUMAN         | 14   | 109         | 1/3                            | 11                     |
| ARI1A_HUMAN        | 50   | 437         | 9/9                            | 4                      |
| ASSY_HUMAN         | 27   | 501         | 13/13                          | 25                     |
| ATD3A_HUMAN        | 35   | 242         | 5/5                            | 7                      |
| ATD3B_HUMAN        | 34   | 109         | 2/2                            | 4                      |
| ATN1_HUMAN         | 46   | 352         | 8/8                            | 6                      |
| ATPA_HUMAN         | 30   | 106         | 2/4                            | 3                      |
| ATPB_HUMAN         | 30   | 328         | 1/5                            | 15                     |
| ATPG_HUMAN         | 17   | 247         | 3/4                            | 14                     |
| ATX2_HUMAN         | 44   | 475         | 9/9                            | 8                      |
| ATX2L_HUMAN        | 43   | 1141        | 24/24                          | 22                     |
| BAT2_HUMAN         | 48   | 2014        | 42/42                          | 22                     |
| BCL7A_HUMAN        | 18   | 120         | 4/4                            | 16                     |
| BUB3_HUMAN         | 23   | 1070        | 24/24                          | 52                     |
| CALM_HUMAN         | 11   | 184         | 0/4                            | 27                     |
| CALU_HUMAN         | 23   | 150         | 0/5                            | 10                     |
| C2D1A_HUMAN        | 43   | 110         | 2/2                            | 2                      |
| CD2B2_HUMAN        | 8    | 244         | 0/4                            | 6                      |
| CD2B2_HUMANendogen | 28   | 474         | 6/8                            | 21                     |
| CH60_HUMAN         | 33   | 292         | 3/6                            | 11                     |
| CIRBP_HUMAN        | 12   | 139         | 1/2                            | 12                     |
| CO4A2_HUMAN        | 47   | 94          | 2/2                            | 1                      |
| COCA1_HUMAN        | 50   | 208         | 5/5                            | 1                      |
| COF1_HUMAN         | 13   | 100         | 1/4                            | 16                     |
| COPA_HUMAN         | 44   | 642         | 0/11                           | 10                     |
| COPB2_HUMAN        | 41   | 512         | 0/13                           | 14                     |
| COPE_HUMAN         | 18   | 201         | 0/5                            | 13                     |
| CPSF1_HUMAN        | 46   | 245         | 7/7                            | 4                      |
| CPSF5_HUMAN        | 8    | 113         | 4/4                            | 10                     |
| CPSF6_HUMAN        | 35   | 1142        | 24/24                          | 30                     |
| CPSF7_HUMAN        | 30   | 648         | 13/13                          | 30                     |
| CPSM_HUMAN         | 46   | 336         | 1/6                            | 4                      |
| CTGE5_HUMAN        | 41   | 481         | 9/9                            | 10                     |
| DCD_HUMAN          | 27   | 285         | 0/3                            | 35                     |
| DDB1_HUMAN         | 43   | 186         | 0/5                            | 3                      |
| DDX17_HUMAN        | 37   | 711         | 13/13                          | 21                     |
| DDX20_HUMAN        | 41   | 869         | 18/18                          | 18                     |
| DDX3X_HUMAN        | 36   | 661         | 13/15                          | 23                     |
| DDX3Y_HUMAN        | 35   | 164         | 2/2                            | 4                      |
| DDX46_HUMAN        | 42   | 252         | 5/5                            | 4                      |
| DDX5_HUMAN         | 35   | 1099        | 25/25                          | 31                     |
| DDX6_HUMAN         | 30   | 427         | 8/8                            | 17                     |
| DEK_HUMAN          | 28   | 151         | 3/3                            | 7                      |
| DESP_HUMAN         | 50   | 643         | 0/12                           | 4                      |
| CBR1_HUMAN         | 16   | 838         | 6/21                           | 51                     |
| DHX15_HUMAN        | 40   | 1523        | 44/44                          | 36                     |

|                    |    |      |       |    |
|--------------------|----|------|-------|----|
| DHX9_HUMAN         | 44 | 315  | 7/7   | 5  |
| DIAP1_HUMAN        | 46 | 99   | 2/2   | 1  |
| DIAP3_HUMAN        | 44 | 290  | 6/6   | 5  |
| DYN2_HUMAN         | 41 | 3387 | 73/73 | 55 |
| EF1A1_HUMAN        | 28 | 490  | 5/14  | 18 |
| EF1B_HUMAN         | 11 | 102  | 0/2   | 9  |
| EF1G_HUMAN         | 27 | 957  | 7/24  | 30 |
| EFTU_HUMAN         | 27 | 687  | 12/13 | 25 |
| ELAV1_HUMAN        | 18 | 163  | 3/3   | 10 |
| ENAH_HUMAN         | 37 | 616  | 14/14 | 20 |
| EPIPL_HUMAN        | 51 | 929  | 0/14  | 3  |
| ERH_HUMAN          | 3  | 135  | 4/4   | 22 |
| EWS_HUMAN          | 37 | 660  | 17/17 | 16 |
| FBSH_HUMAN         | 43 | 119  | 3/3   | 11 |
| FUBP1_HUMAN        | 37 | 351  | 3/3   | 8  |
| FUBP2_HUMAN        | 38 | 2117 | 48/48 | 43 |
| FUS_HUMAN          | 32 | 363  | 8/8   | 16 |
| FYB_HUMAN          | 20 | 1138 | 0/18  | 10 |
| G3BP1_HUMAN        | 32 | 551  | 14/14 | 29 |
| G3BP2_HUMAN        | 32 | 136  | 3/3   | 9  |
| GBG12_HUMAN        | 1  | 171  | 0/3   | 35 |
| GBLP_HUMAN         | 17 | 255  | 4/4   | 14 |
| GEMI4_HUMAN        | 42 | 1435 | 31/31 | 24 |
| GEMI5_HUMAN        | 46 | 155  | 3/3   | 1  |
| GEMI6_HUMAN        | 12 | 221  | 3/4   | 21 |
| G137A, CAPR1_HUMAN | 40 | 507  | 14/15 | 13 |
| GRP75_HUMAN        | 37 | 1153 | 4/25  | 38 |
| GRP78_HUMAN        | 37 | 2049 | 24/63 | 52 |
| GSTM3_HUMAN        | 12 | 297  | 2/6   | 19 |
| H2A1A_HUMAN        | 7  | 127  | 2/4   | 20 |
| H2B1B_HUMAN        | 8  | 204  | 5/7   | 39 |
| H4_HUMAN           | 5  | 224  | 1/6   | 39 |
| HMGA1_HUMAN        | 11 | 121  | 4/4   | 49 |
| HN1L_HUMAN         | 14 | 120  | 2/2   | 14 |
| HNRH1_HUMAN        | 30 | 295  | 5/6   | 16 |
| HNRL1_HUMAN        | 40 | 180  | 4/4   | 5  |
| HNRPC_HUMAN        | 21 | 172  | 5/5   | 17 |
| HNRPF_HUMAN        | 28 | 333  | 7/7   | 19 |
| HNRPG_HUMAN        | 26 | 725  | 22/22 | 51 |
| HNRPK_HUMAN        | 32 | 607  | 19/19 | 34 |
| HNRPM_HUMAN        | 37 | 1150 | 23/36 | 34 |
| HNRPQ_HUMAN        | 34 | 335  | 7/7   | 11 |
| HNRPU_HUMAN        | 42 | 861  | 20/20 | 16 |
| HORN_HUMAN         | 51 | 138  | 0/4   | 2  |
| HS90B_HUMAN        | 39 | 746  | 8/20  | 21 |
| HSP71_HUMAN        | 35 | 1712 | 23/48 | 41 |
| HSP7C_HUMAN        | 36 | 2151 | 28/60 | 50 |
| HTSF1_HUMAN        | 42 | 503  | 11/11 | 14 |
| ICLN_HUMAN         | 19 | 214  | 5/5   | 21 |
| IF4G1_HUMAN        | 48 | 120  | 2/2   | 1  |
| ILF2_HUMAN         | 27 | 256  | 4/4   | 12 |
| ILF3_HUMAN         | 40 | 108  | 4/4   | 4  |
| IMA1_HUMAN         | 34 | 511  | 12/12 | 15 |

|             |    |      |       |    |
|-------------|----|------|-------|----|
| IMB1_HUMAN  | 40 | 134  | 0/2   | 3  |
| SC16A_HUMAN | 50 | 396  | 9/9   | 4  |
| K1C10_HUMAN | 51 | 1127 | 0/22  | 31 |
| K1C14_HUMAN | 51 | 556  | 0/4   | 22 |
| K1C16_HUMAN | 28 | 365  | 0/4   | 16 |
| K1C17_HUMAN | 29 | 846  | 0/18  | 37 |
| K1C18_HUMAN | 27 | 3232 | 28/81 | 76 |
| K1C9_HUMAN  | 51 | 1193 | 0/21  | 33 |
| K22E_HUMAN  | 1  | 1039 | 0/13  | 21 |
| K2C1_HUMAN  | 51 | 2072 | 0/34  | 42 |
| K2C6A_HUMAN | 28 | 392  | 0/6   | 14 |
| K2C6B_HUMAN | 4  | 370  | 0/6   | 12 |
| K2C7_HUMAN  | 30 | 1948 | 3/32  | 48 |
| K2C8_HUMAN  | 30 | 3442 | 24/82 | 73 |
| KU70_HUMAN  | 36 | 378  | 7/7   | 15 |
| KU86_HUMAN  | 38 | 268  | 7/7   | 9  |
| LANC1_HUMAN | 23 | 314  | 6/13  | 15 |
| LASP1_HUMAN | 19 | 306  | 6/8   | 27 |
| LDB1_HUMAN  | 27 | 110  | 2/3   | 7  |
| LDHA_HUMAN  | 19 | 130  | 0/2   | 6  |
| LMO7_HUMAN  | 43 | 249  | 0/5   | 2  |
| LPPRC_HUMAN | 44 | 190  | 3/4   | 3  |
| LRC59_HUMAN | 17 | 157  | 4/4   | 11 |
| LSM6_HUMAN  | 1  | 137  | 4/4   | 37 |
| MED21_HUMAN | 11 | 128  | 1/2   | 17 |
| MEP50_HUMAN | 23 | 286  | 8/8   | 15 |
| ML12A_HUMAN | 14 | 583  | 1/11  | 55 |
| MOV10_HUMAN | 42 | 185  | 3/3   | 3  |
| MYH9_HUMAN  | 49 | 5027 | 0/96  | 40 |
| MYL6_HUMAN  | 9  | 465  | 0/9   | 45 |
| MYO1C_HUMAN | 42 | 114  | 0/2   | 3  |
| MYO1E_HUMAN | 43 | 1030 | 23/23 | 18 |
| NONO_HUMAN  | 32 | 3449 | 79/80 | 66 |
| NPM_HUMAN   | 21 | 794  | 16/19 | 38 |
| NUCL_HUMAN  | 41 | 950  | 19/19 | 25 |
| NUFP2_HUMAN | 38 | 213  | 3/4   | 7  |
| P80C_HUMAN  | 36 | 154  | 2/2   | 3  |
| PABP1_HUMAN | 36 | 1275 | 20/22 | 29 |
| PABP4_HUMAN | 37 | 765  | 15/15 | 24 |
| PAIRB_HUMAN | 29 | 326  | 6/7   | 19 |
| PARP1_HUMAN | 42 | 229  | 4/4   | 4  |
| PCBP1_HUMAN | 23 | 222  | 4/6   | 14 |
| PHB2_HUMAN  | 19 | 267  | 2/6   | 15 |
| PHF5A_HUMAN | 6  | 149  | 4/4   | 20 |
| PLEC1_HUMAN | 51 | 6622 | 1/136 | 26 |
| PLOD1_HUMAN | 38 | 349  | 6/6   | 10 |
| PLOD3_HUMAN | 38 | 880  | 16/16 | 25 |
| PM14_HUMAN  | 6  | 418  | 10/10 | 56 |
| PQBP1_HUMAN | 19 | 630  | 12/12 | 35 |
| PRP31_HUMAN | 32 | 379  | 10/10 | 18 |
| PRP4_HUMAN  | 32 | 138  | 4/4   | 8  |
| PRP6_HUMAN  | 42 | 1234 | 29/29 | 29 |
| PRP8_HUMAN  | 50 | 1935 | 46/46 | 18 |

|             |    |      |       |    |
|-------------|----|------|-------|----|
| PRPF3_HUMAN | 38 | 1028 | 18/18 | 25 |
| RBM33_HUMAN | 47 | 318  | 10/10 | 23 |
| PSMD3_HUMAN | 34 | 148  | 3/3   | 8  |
| PTBP1_HUMAN | 30 | 126  | 3/3   | 4  |
| PYGO2_HUMAN | 27 | 176  | 3/5   | 13 |
| RAPH1_HUMAN | 46 | 244  | 6/6   | 6  |
| RBM14_HUMAN | 35 | 157  | 2/2   | 3  |
| RBP56_HUMAN | 35 | 216  | 4/4   | 7  |
| RED_HUMAN   | 37 | 126  | 3/3   | 4  |
| RENT1_HUMAN | 43 | 202  | 4/4   | 4  |
| REQU_HUMAN  | 27 | 432  | 7/8   | 23 |
| RIOK1_HUMAN | 38 | 209  | 5/5   | 13 |
| RL11_HUMAN  | 15 | 299  | 8/9   | 33 |
| RL12_HUMAN  | 12 | 455  | 8/9   | 48 |
| RL17_HUMAN  | 15 | 109  | 2/2   | 10 |
| RL21_HUMAN  | 14 | 434  | 11/12 | 44 |
| RL22_HUMAN  | 9  | 195  | 3/4   | 35 |
| RL23A_HUMAN | 14 | 399  | 8/9   | 27 |
| RL24_HUMAN  | 14 | 348  | 9/9   | 34 |
| RL26_HUMAN  | 12 | 486  | 13/14 | 46 |
| RL26L_HUMAN | 11 | 413  | 8/8   | 35 |
| RL27_HUMAN  | 10 | 336  | 8/8   | 45 |
| RL27A_HUMAN | 10 | 106  | 2/2   | 12 |
| RL28_HUMAN  | 11 | 278  | 6/7   | 42 |
| RL29_HUMAN  | 15 | 156  | 4/4   | 27 |
| RL3_HUMAN   | 28 | 291  | 9/9   | 15 |
| RL30_HUMAN  | 6  | 121  | 4/4   | 29 |
| RL31_HUMAN  | 9  | 201  | 5/6   | 39 |
| RL32_HUMAN  | 11 | 114  | 3/4   | 23 |
| RL35_HUMAN  | 10 | 253  | 7/9   | 38 |
| RL35A_HUMAN | 6  | 207  | 7/8   | 48 |
| RL36_HUMAN  | 7  | 137  | 5/5   | 18 |
| RL38_HUMAN  | 3  | 119  | 3/3   | 34 |
| RL4_HUMAN   | 28 | 385  | 10/10 | 16 |
| RL5_HUMAN   | 18 | 284  | 7/7   | 23 |
| RL6_HUMAN   | 21 | 376  | 7/7   | 25 |
| RLA0_HUMAN  | 19 | 620  | 13/14 | 44 |
| RLA2_HUMAN  | 7  | 567  | 10/11 | 91 |
| RM12_HUMAN  | 15 | 146  | 2/3   | 18 |
| ROA0_HUMAN  | 18 | 141  | 2/2   | 7  |
| ROA1_HUMAN  | 19 | 762  | 15/15 | 29 |
| ROA2_HUMAN  | 19 | 574  | 9/9   | 30 |
| ROAA_HUMAN  | 20 | 125  | 2/2   | 6  |
| RS10_HUMAN  | 12 | 580  | 11/17 | 55 |
| RS11_HUMAN  | 12 | 380  | 8/9   | 32 |
| RS13_HUMAN  | 10 | 536  | 11/12 | 55 |
| RS14_HUMAN  | 9  | 266  | 5/5   | 18 |
| RS15_HUMAN  | 12 | 275  | 7/9   | 26 |
| RS15A_HUMAN | 8  | 295  | 8/9   | 43 |
| RS16_HUMAN  | 9  | 305  | 8/8   | 49 |
| RS17_HUMAN  | 11 | 294  | 7/9   | 27 |
| RS18_HUMAN  | 11 | 799  | 18/23 | 52 |
| RS19_HUMAN  | 8  | 795  | 21/25 | 68 |

|             |    |      |       |    |
|-------------|----|------|-------|----|
| RS2_HUMAN   | 16 | 108  | 3/4   | 13 |
| RS20_HUMAN  | 8  | 101  | 4/4   | 21 |
| RS23_HUMAN  | 10 | 191  | 4/4   | 21 |
| RS24_HUMAN  | 10 | 102  | 3/3   | 17 |
| RS25_HUMAN  | 10 | 392  | 8/10  | 52 |
| RS26_HUMAN  | 8  | 175  | 4/5   | 40 |
| RS27_HUMAN  | 3  | 127  | 3/3   | 31 |
| RS27A_HUMAN | 6  | 96   | 3/4   | 26 |
| RS28_HUMAN  | 2  | 124  | 2/2   | 33 |
| RS29_HUMAN  | 1  | 108  | 3/3   | 32 |
| RS30_HUMAN  | 3  | 145  | 3/3   | 33 |
| RS3A_HUMAN  | 16 | 465  | 13/14 | 35 |
| RT28_HUMAN  | 11 | 154  | 4/4   | 19 |
| RU17_HUMAN  | 34 | 559  | 15/15 | 22 |
| RU1C_HUMAN  | 15 | 202  | 4/4   | 18 |
| RU2A_HUMAN  | 11 | 139  | 2/2   | 10 |
| RU2B_HUMAN  | 8  | 148  | 3/3   | 12 |
| RUXE_HUMAN  | 3  | 199  | 5/7   | 47 |
| RUXF_HUMAN  | 3  | 253  | 7/7   | 50 |
| RUXG_HUMAN  | 1  | 197  | 6/6   | 36 |
| KHDR1_HUMAN | 33 | 1058 | 27/27 | 44 |
| SART3_HUMAN | 43 | 326  | 7/7   | 7  |
| SERA_HUMAN  | 31 | 121  | 0/2   | 4  |
| SF01_HUMAN  | 38 | 425  | 8/8   | 13 |
| SF3A1_HUMAN | 41 | 2480 | 50/50 | 45 |
| SF3A2_HUMAN | 32 | 559  | 15/15 | 28 |
| SF3A3_HUMAN | 31 | 1014 | 23/23 | 27 |
| SF3B1_HUMAN | 42 | 326  | 6/6   | 5  |
| SF3B2_HUMAN | 43 | 3673 | 72/72 | 62 |
| SF3B3_HUMAN | 43 | 2165 | 44/44 | 31 |
| SF3B4_HUMAN | 28 | 233  | 6/6   | 11 |
| SF3B5_HUMAN | 3  | 248  | 6/6   | 54 |
| SFPQ_HUMAN  | 40 | 3026 | 72/73 | 50 |
| SFR15_HUMAN | 46 | 173  | 4/4   | 4  |
| SFRS1_HUMAN | 17 | 296  | 6/6   | 22 |
| SFRS2_HUMAN | 17 | 293  | 9/9   | 27 |
| SFRS3_HUMAN | 15 | 174  | 4/4   | 31 |
| SFRS5_HUMAN | 21 | 139  | 4/4   | 13 |
| SFRS6_HUMAN | 29 | 250  | 5/5   | 14 |
| SFRS7_HUMAN | 18 | 121  | 2/2   | 12 |
| SMCA2_HUMAN | 48 | 965  | 3/3   | 11 |
| SMCA4_HUMAN | 48 | 2036 | 41/41 | 23 |
| SMCE1_HUMAN | 28 | 661  | 11/11 | 29 |
| SMD1_HUMAN  | 7  | 325  | 7/7   | 37 |
| SMD2_HUMAN  | 7  | 485  | 14/14 | 64 |
| SMD3_HUMAN  | 7  | 159  | 5/5   | 36 |
| SMN_HUMAN   | 18 | 271  | 5/5   | 13 |
| SMRC1_HUMAN | 44 | 1392 | 32/32 | 21 |
| SMRC2_HUMAN | 46 | 1394 | 35/35 | 22 |
| SMRD1_HUMAN | 32 | 465  | 9/9   | 19 |
| SMRD2_HUMAN | 32 | 202  | 4/4   | 10 |
| SNF5_HUMAN  | 27 | 432  | 8/8   | 23 |
| SNRPA_HUMAN | 18 | 639  | 15/15 | 46 |

|                   |    |      |       |    |
|-------------------|----|------|-------|----|
| SNUT1_HUMAN       | 42 | 296  | 5/5   | 6  |
| SNUT2_HUMAN       | 35 | 290  | 6/6   | 10 |
| SPF45_HUMAN       | 30 | 470  | 11/11 | 22 |
| SPTA2_HUMAN       | 50 | 118  | 0/3   | 1  |
| SRP09_HUMAN       | 3  | 127  | 3/3   | 30 |
| SRP14_HUMAN       | 10 | 436  | 9/9   | 41 |
| SSBP3_HUMAN       | 23 | 310  | 6/6   | 11 |
| SSBP4_HUMAN       | 27 | 154  | 2/2   | 7  |
| SSRP1_HUMAN       | 37 | 97   | 2/2   | 2  |
| STRAP_HUMAN       | 23 | 658  | 14/14 | 37 |
| TBA4A_HUMAN       | 30 | 536  | 1/2   | 3  |
| TBA1B_HUMAN       | 30 | 785  | 11/22 | 31 |
| TBB2C, TBB5_HUMAN | 30 | 1097 | 15/32 | 35 |
| TCP4_HUMAN        | 9  | 392  | 10/11 | 55 |
| TCRG1_HUMAN       | 44 | 3556 | 75/75 | 42 |
| TFG_HUMAN         | 28 | 216  | 2/7   | 13 |
| THIO_HUMAN        | 5  | 183  | 2/6   | 31 |
| TM109_HUMAN       | 15 | 339  | 7/7   | 16 |
| TMOD3_HUMAN       | 23 | 195  | 0/5   | 15 |
| TPM2_HUMAN        | 21 | 428  | 0/9   | 23 |
| TRA2B_HUMAN       | 23 | 221  | 5/5   | 15 |
| TRI25_HUMAN       | 36 | 243  | 4/4   | 6  |
| TXN4A_HUMAN       | 7  | 207  | 1/5   | 21 |
| U520_HUMAN        | 48 | 2156 | 46/46 | 19 |
| U5S1_HUMAN        | 42 | 1740 | 37/38 | 35 |
| UBIQ_HUMAN        | 1  | 94   | 0/2   | 32 |
| UBP2L_HUMAN       | 43 | 133  | 2/2   | 2  |
| VASP_HUMAN        | 27 | 1338 | 20/20 | 42 |
| VIME_HUMAN        | 31 | 187  | 0/5   | 12 |
| WIPF1_HUMAN       | 33 | 477  | 12/12 | 23 |
| WASL_HUMAN        | 34 | 822  | 20/20 | 35 |
| WBP11_HUMAN       | 39 | 2194 | 45/45 | 40 |
| WDR61_HUMAN       | 17 | 243  | 7/7   | 16 |
| WDR68_HUMAN       | 23 | 180  | 5/5   | 12 |
| WIPF2_HUMAN       | 30 | 715  | 15/15 | 38 |
| WRIP1_HUMAN       | 38 | 563  | 13/13 | 18 |
| YBOX1_HUMAN       | 27 | 439  | 9/10  | 37 |
| YTHD2_HUMAN       | 34 | 100  | 2/2   | 4  |
| ZCCHV_HUMAN       | 41 | 115  | 2/2   | 2  |
| ZN207_HUMAN       | 30 | 640  | 11/11 | 18 |
| ZN598_HUMAN       | 41 | 1275 | 26/26 | 25 |

\*includes all peptides that were uniquely assigned to one protein homology or identity based on a significant score given by Mascot
