# Supplementary material
Source: PubMed Central journal article supplement (PMC2773714)
Supplement: M900191-MCP200_10.pdf [file M900191-MCP200_10.pdf]

## Supplementary Table S8

Accession number, SDS-PAGE excised band number, total score, the numbers of <sup>13</sup>C-labeled and total unique peptides as well as the sequence coverage are listed for all identified proteins of the 15K pulldown ± phage display peptide PD1.

| protein     | band | total score | #:C13-peptides/#:all peptides* | sequence coverage in % |
|-------------|------|-------------|--------------------------------|------------------------|
| 4F2_HUMAN   | 19   | 234         | 0/3                            | 7                      |
| ACLY_HUMAN  | 15   | 1159        | 7/31                           | 24                     |
| ACOT9_HUMAN | 29   | 218         | 0/4                            | 10                     |
| ACTB_HUMAN  | 32   | 1324        | 16/42                          | 42                     |
| ADT3_HUMAN  | 35   | 628         | 2/3                            | 6                      |
| ALBU_HUMAN  | 4    | 266         | 0/2                            | 3                      |
| APOD_HUMAN  | 11   | 198         | 0/5                            | 24                     |
| ARF4_HUMAN  | 41   | 201         | 0/5                            | 20                     |
| ARHG2_HUMAN | 15   | 266         | 2/6                            | 5                      |
| ARHG7_HUMAN | 20   | 99          | 1/3                            | 3                      |
| ASSY_HUMAN  | 31   | 128         | 0/3                            | 7                      |
| ATD3A_HUMAN | 24   | 428         | 0/10                           | 14                     |
| ATP5H_HUMAN | 39   | 118         | 0/3                            | 17                     |
| ATPA_HUMAN  | 28   | 560         | 0/10                           | 18                     |
| ATPB_HUMAN  | 28   | 377         | 0/6                            | 14                     |
| ATPO_HUMAN  | 38   | 170         | 0/3                            | 15                     |
| C4BPA_HUMAN | 24   | 297         | 5/13                           | 11                     |
| RPAP2_HUMAN | 19   | 239         | 4/5                            | 12                     |
| CALM_HUMAN  | 42   | 207         | 0/4                            | 35                     |
| CALU_HUMAN  | 31   | 116         | 1/3                            | 6                      |
| CALX_HUMAN  | 18   | 114         | 0/2                            | 6                      |
| CASPE_HUMAN | 20   | 94          | 0/2                            | 4                      |
| CD2B2_HUMAN | 28   | 744         | 10/23                          | 34                     |
| CH60_HUMAN  | 26   | 617         | 2/13                           | 20                     |
| CLH1_HUMAN  | 10   | 369         | 0/6                            | 4                      |
| CLUS_HUMAN  | 11   | 211         | 0/5                            | 10                     |
| COPA_HUMAN  | 11   | 1206        | 4/27                           | 19                     |
| COPB_HUMAN  | 17   | 132         | 0/2                            | 2                      |
| COX2_HUMAN  | 39   | 97          | 0/2                            | 7                      |
| CPSM_HUMAN  | 11   | 1589        | 3/33                           | 22                     |
| CSRP2_HUMAN | 40   | 99          | 1/3                            | 13                     |
| CUL1_HUMAN  | 19   | 194         | 0/6                            | 6                      |
| CYTA_HUMAN  | 47   | 260         | 0/5                            | 55                     |
| DCD_HUMAN   | 14   | 322         | 0/4                            | 35                     |
| DDB1_HUMAN  | 14   | 329         | 1/7                            | 4                      |
| DDX1_HUMAN  | 19   | 544         | 6/15                           | 16                     |
| DDX17_HUMAN | 23   | 813         | 4/18                           | 24                     |
| DDX23_HUMAN | 13   | 566         | 0/13                           | 16                     |
| DDX3X_HUMAN | 21   | 2608        | 37/85                          | 64                     |
| DDX3Y_HUMAN | 40   | 113         | 0/2                            | 3                      |
| DDX5_HUMAN  | 24   | 1136        | 14/36                          | 32                     |
| DESP_HUMAN  | 5    | 7153        | 82/209                         | 42                     |
| CBR3_HUMAN  | 34   | 438         | 2/2                            | 24                     |
| CBR1_HUMAN  | 34   | 1721        | 27/54                          | 50                     |
| DHX15_HUMAN | 19   | 344         | 0/7                            | 8                      |
| DHX16_HUMAN | 13   | 594         | 10/11                          | 9                      |
| DHX30_HUMAN | 13   | 99          | 0/4                            | 3                      |
| DHX9_HUMAN  | 12   | 938         | 8/25                           | 13                     |
| EF1A1_HUMAN | 29   | 531         | 6/17                           | 23                     |
| EF1B_HUMAN  | 34   | 516         | 4/14                           | 36                     |
| EF1G_HUMAN  | 30   | 1286        | 16/37                          | 31                     |
| EF2_HUMAN   | 18   | 737         | 5/21                           | 18                     |

|                    |    |      |       |    |
|--------------------|----|------|-------|----|
| EFTU_HUMAN         | 32 | 778  | 7/18  | 33 |
| ENPL_HUMAN         | 17 | 151  | 0/2   | 3  |
| EPIPL_HUMAN        | 5  | 434  | 2/6   | 1  |
| EWS_HUMAN          | 19 | 479  | 4/11  | 13 |
| FAS_HUMAN          | 6  | 542  | 0/11  | 4  |
| FBX11_HUMAN        | 15 | 265  | 0/5   | 7  |
| FBX28_HUMAN        | 33 | 333  | 1/7   | 15 |
| FBXW8_HUMAN        | 23 | 683  | 2/11  | 16 |
| FOLC_HUMAN         | 26 | 194  | 1/4   | 5  |
| FUS_HUMAN          | 23 | 539  | 6/14  | 14 |
| G3BP1_HUMAN        | 24 | 330  | 2/9   | 13 |
| GBG12_HUMAN        | 49 | 206  | 0/4   | 57 |
| G137A, CAPR1_HUMAN | 16 | 482  | 6/12  | 13 |
| GRP75_HUMAN        | 21 | 385  | 8/8   | 12 |
| GRP78_HUMAN        | 21 | 1311 | 27/27 | 41 |
| GSTM3_HUMAN        | 37 | 1746 | 22/55 | 68 |
| H2AV_HUMAN         | 45 | 143  | 1/4   | 22 |
| H2B1B_HUMAN        | 32 | 144  | 0/4   | 27 |
| H2B1C_HUMAN        | 44 | 361  | 2/11  | 58 |
| H4_HUMAN           | 46 | 400  | 0/8   | 51 |
| HDAC3_HUMAN        | 29 | 157  | 5/5   | 8  |
| HMGA1_HUMAN        | 43 | 168  | 0/4   | 38 |
| HNRH1_HUMAN        | 28 | 1692 | 25/49 | 35 |
| HNRL1_HUMAN        | 18 | 139  | 0/4   | 3  |
| HNRPF_HUMAN        | 30 | 1273 | 18/44 | 35 |
| HNRPG_HUMAN        | 32 | 174  | 3/6   | 9  |
| HNRPK_HUMAN        | 25 | 498  | 6/19  | 28 |
| HNRPM_HUMAN        | 23 | 1375 | 10/36 | 34 |
| HNRPQ_HUMAN        | 24 | 272  | 0/4   | 8  |
| HNRPU_HUMAN        | 13 | 549  | 1/11  | 13 |
| HS90A_HUMAN        | 19 | 779  | 0/2   | 16 |
| HS90B_HUMAN        | 19 | 1299 | 12/32 | 28 |
| HSP71_HUMAN        | 24 | 1347 | 26/31 | 36 |
| HSP7C_HUMAN        | 23 | 1651 | 28/45 | 43 |
| HSPB1_HUMAN        | 37 | 206  | 2/5   | 22 |
| EIF3G, EIF3I_HUMAN | 32 | 384  | 5/6   | 16 |
| EIF3F_HUMAN        | 30 | 437  | 10/11 | 26 |
| EIF3E_HUMAN        | 30 | 420  | 9/9   | 18 |
| EIF3D_HUMAN        | 24 | 216  | 5/5   | 8  |
| EIF3C_HUMAN        | 15 | 590  | 13/15 | 13 |
| EIF3B_HUMAN        | 15 | 322  | 8/9   | 9  |
| EIF3A_HUMAN        | 9  | 1864 | 49/53 | 27 |
| IF3EI_HUMAN        | 24 | 340  | 3/7   | 10 |
| IF4B_HUMAN         | 20 | 286  | 3/8   | 9  |
| ILF2_HUMAN         | 32 | 256  | 0/5   | 15 |
| ILF3_HUMAN         | 19 | 240  | 0/5   | 7  |
| IMMT_HUMAN         | 19 | 110  | 0/2   | 2  |
| K1C10_HUMAN        | 23 | 627  | 0/10  | 21 |
| K1C14_HUMAN        | 40 | 559  | 0/3   | 20 |
| K1C16_HUMAN        | 40 | 708  | 0/14  | 26 |
| K1C17_HUMAN        | 30 | 957  | 10/22 | 40 |
| K1C18_HUMAN        | 31 | 3483 | 46/97 | 58 |
| K1C9_HUMAN         | 23 | 1873 | 0/30  | 38 |

|             |    |      |        |    |
|-------------|----|------|--------|----|
| KRT36_HUMAN | 48 | 102  | 0/3    | 3  |
| K22E_HUMAN  | 24 | 424  | 0/5    | 12 |
| K2C1_HUMAN  | 23 | 1257 | 0/25   | 32 |
| K2C5_HUMAN  | 23 | 596  | 0/11   | 17 |
| K2C6A_HUMAN | 27 | 570  | 0/7    | 7  |
| K2C7_HUMAN  | 28 | 1961 | 19/43  | 47 |
| K2C8_HUMAN  | 28 | 2630 | 45/94  | 57 |
| K6PF_HUMAN  | 20 | 493  | 1/9    | 10 |
| K6PP_HUMAN  | 19 | 157  | 0/3    | 5  |
| KPYM_HUMAN  | 26 | 153  | 0/3    | 5  |
| KU70_HUMAN  | 23 | 250  | 0/4    | 6  |
| KU86_HUMAN  | 19 | 160  | 0/3    | 4  |
| LANC1_HUMAN | 46 | 157  | 1/3    | 7  |
| LARP1_HUMAN | 11 | 240  | 5/9    | 7  |
| LG3BP_HUMAN | 21 | 132  | 0/3    | 6  |
| LPPRC_HUMAN | 12 | 286  | 0/6    | 5  |
| LYRIC_HUMAN | 20 | 120  | 1/4    | 5  |
| LYSC_HUMAN  | 45 | 147  | 0/3    | 18 |
| MCM7_HUMAN  | 20 | 163  | 0/4    | 6  |
| ML12A_HUMAN | 41 | 524  | 6/16   | 39 |
| MOV10_HUMAN | 15 | 173  | 0/3    | 3  |
| MPCP_HUMAN  | 34 | 96   | 0/2    | 5  |
| MYCB2_HUMAN | 5  | 249  | 0/6    | 1  |
| MYH9_HUMAN  | 8  | 6757 | 33/141 | 47 |
| MYL6_HUMAN  | 44 | 446  | 4/12   | 53 |
| NCOR1_HUMAN | 3  | 1104 | 23/23  | 10 |
| NCOR2_HUMAN | 3  | 262  | 5/5    | 2  |
| NONO_HUMAN  | 26 | 463  | 5/15   | 23 |
| NPM_HUMAN   | 6  | 130  | 0/3    | 8  |
| NUCL_HUMAN  | 15 | 937  | 5/22   | 28 |
| PABP1_HUMAN | 23 | 732  | 5/19   | 23 |
| PABP4_HUMAN | 21 | 160  | 1/4    | 6  |
| PAIRB_HUMAN | 27 | 139  | 0/2    | 5  |
| PCBP1_HUMAN | 33 | 200  | 0/4    | 13 |
| PDCD6_HUMAN | 39 | 166  | 1/4    | 15 |
| PHB_HUMAN   | 35 | 131  | 0/2    | 7  |
| PIP_HUMAN   | 11 | 115  | 0/2    | 15 |
| PKP2_HUMAN  | 19 | 137  | 1/3    | 3  |
| PKP3_HUMAN  | 19 | 2482 | 32/68  | 49 |
| PLAK_HUMAN  | 23 | 102  | 0/2    | 2  |
| PLEC1_HUMAN | 3  | 3469 | 32/82  | 14 |
| PLOD1_HUMAN | 20 | 1681 | 18/48  | 42 |
| PLOD2_HUMAN | 18 | 979  | 7/26   | 26 |
| PRDX1_HUMAN | 38 | 216  | 0/5    | 22 |
| PRP16_HUMAN | 11 | 1268 | 0/26   | 20 |
| PRP19_HUMAN | 27 | 112  | 1/4    | 5  |
| PRP6_HUMAN  | 16 | 2527 | 26/77  | 45 |
| PRP8_HUMAN  | 7  | 6060 | 53/173 | 45 |
| PTBP1_HUMAN | 27 | 120  | 0/3    | 5  |
| PTN11_HUMAN | 18 | 234  | 0/7    | 12 |
| PYR1_HUMAN  | 7  | 134  | 0/3    | 1  |
| RBM14_HUMAN | 29 | 413  | 7/7    | 9  |
| RBM3_HUMAN  | 43 | 156  | 1/5    | 18 |

|             |    |      |       |    |
|-------------|----|------|-------|----|
| RBP56_HUMAN | 21 | 139  | 0/4   | 6  |
| RCC2_HUMAN  | 26 | 294  | 1/8   | 12 |
| RCN1_HUMAN  | 32 | 165  | 0/4   | 9  |
| RED_HUMAN   | 20 | 200  | 4/7   | 8  |
| RENT1_HUMAN | 13 | 170  | 0/3   | 2  |
| RL10A_HUMAN | 37 | 171  | 1/6   | 20 |
| RL11_HUMAN  | 40 | 363  | 5/11  | 35 |
| RL12_HUMAN  | 42 | 465  | 4/11  | 55 |
| RL13_HUMAN  | 35 | 465  | 3/10  | 34 |
| RL13A_HUMAN | 38 | 107  | 1/3   | 13 |
| RL17_HUMAN  | 39 | 364  | 2/11  | 33 |
| RL18A_HUMAN | 39 | 322  | 5/11  | 35 |
| RL19_HUMAN  | 37 | 154  | 1/4   | 13 |
| RL21_HUMAN  | 39 | 529  | 6/18  | 48 |
| RL22_HUMAN  | 44 | 155  | 2/6   | 31 |
| RL22L_HUMAN | 45 | 183  | 0/2   | 19 |
| RL23_HUMAN  | 45 | 264  | 2/8   | 35 |
| RL23A_HUMAN | 40 | 463  | 4/13  | 39 |
| RL24_HUMAN  | 39 | 295  | 4/11  | 24 |
| RL26_HUMAN  | 41 | 589  | 7/19  | 53 |
| RL27_HUMAN  | 44 | 358  | 5/11  | 55 |
| RL27A_HUMAN | 43 | 155  | 1/4   | 19 |
| RL28_HUMAN  | 43 | 296  | 3/8   | 40 |
| RL29_HUMAN  | 39 | 97   | 1/3   | 20 |
| RL3_HUMAN   | 31 | 523  | 6/18  | 20 |
| RL30_HUMAN  | 46 | 234  | 2/7   | 28 |
| RL31_HUMAN  | 44 | 271  | 4/11  | 40 |
| RL32_HUMAN  | 43 | 140  | 2/6   | 23 |
| RL34_HUMAN  | 44 | 192  | 2/6   | 21 |
| RL35_HUMAN  | 43 | 313  | 5/11  | 43 |
| RL35A_HUMAN | 46 | 328  | 6/17  | 55 |
| RL36_HUMAN  | 45 | 129  | 0/3   | 25 |
| RL37A_HUMAN | 47 | 235  | 3/8   | 43 |
| RL38_HUMAN  | 48 | 135  | 0/2   | 33 |
| RL4_HUMAN   | 29 | 588  | 6/17  | 27 |
| RL7_HUMAN   | 34 | 412  | 4/11  | 28 |
| RL7A_HUMAN  | 34 | 306  | 2/8   | 21 |
| RL8_HUMAN   | 34 | 465  | 4/13  | 32 |
| RLA1_HUMAN  | 44 | 121  | 1/3   | 28 |
| RLA2_HUMAN  | 45 | 493  | 4/14  | 93 |
| RPB1_HUMAN  | 8  | 660  | 10/13 | 6  |
| RPB2_HUMAN  | 12 | 1001 | 17/21 | 16 |
| RS10_HUMAN  | 42 | 621  | 9/24  | 54 |
| RS11_HUMAN  | 41 | 441  | 6/12  | 33 |
| RS13_HUMAN  | 43 | 623  | 12/26 | 62 |
| RS14_HUMAN  | 44 | 171  | 2/5   | 22 |
| RS15_HUMAN  | 42 | 170  | 1/4   | 18 |
| RS15A_HUMAN | 45 | 517  | 7/19  | 58 |
| RS16_HUMAN  | 44 | 557  | 6/18  | 58 |
| RS17_HUMAN  | 43 | 341  | 4/10  | 27 |
| RS18_HUMAN  | 43 | 765  | 13/27 | 62 |
| RS19_HUMAN  | 44 | 681  | 4/18  | 58 |
| RS20_HUMAN  | 45 | 141  | 0/4   | 19 |

|                   |    |      |       |    |
|-------------------|----|------|-------|----|
| RS23_HUMAN        | 43 | 168  | 3/5   | 21 |
| RS25_HUMAN        | 44 | 409  | 7/14  | 39 |
| RS26_HUMAN        | 45 | 200  | 4/8   | 40 |
| RS27_HUMAN        | 48 | 218  | 2/7   | 40 |
| RS27L_HUMAN       | 48 | 204  | 1/2   | 40 |
| RS28_HUMAN        | 49 | 235  | 0/4   | 46 |
| RS29_HUMAN        | 50 | 135  | 1/3   | 47 |
| RS3_HUMAN         | 34 | 820  | 7/24  | 59 |
| RS4X_HUMAN        | 35 | 812  | 11/25 | 55 |
| RS5_HUMAN         | 38 | 166  | 3/8   | 16 |
| RS6_HUMAN         | 34 | 360  | 2/7   | 25 |
| RS7_HUMAN         | 38 | 278  | 4/11  | 43 |
| RS8_HUMAN         | 36 | 319  | 3/7   | 22 |
| RS9_HUMAN         | 38 | 314  | 2/8   | 38 |
| RSMN_HUMAN        | 36 | 250  | 1/6   | 16 |
| RSSA_HUMAN        | 32 | 96   | 0/2   | 7  |
| RT17_HUMAN        | 44 | 94   | 0/2   | 15 |
| RUXE_HUMAN        | 48 | 250  | 3/10  | 47 |
| RUXF_HUMAN        | 48 | 109  | 1/4   | 24 |
| RUXG_HUMAN        | 50 | 208  | 2/6   | 36 |
| S10A4_HUMAN       | 48 | 140  | 0/3   | 28 |
| SAFB1_HUMAN       | 10 | 561  | 6/18  | 15 |
| KHDR1_HUMAN       | 24 | 526  | 5/14  | 22 |
| SERA_HUMAN        | 27 | 140  | 1/4   | 5  |
| SF3A2_HUMAN       | 3  | 98   | 0/3   | 7  |
| SF3B1_HUMAN       | 11 | 272  | 2/7   | 6  |
| SF3B3_HUMAN       | 12 | 165  | 1/3   | 2  |
| SFPQ_HUMAN        | 17 | 626  | 4/19  | 20 |
| SKP1_HUMAN        | 41 | 507  | 6/17  | 35 |
| SMD1_HUMAN        | 45 | 286  | 1/6   | 37 |
| SMD2_HUMAN        | 45 | 210  | 4/11  | 44 |
| SMD3_HUMAN        | 45 | 234  | 3/9   | 36 |
| SNUT1_HUMAN       | 15 | 1222 | 5/28  | 27 |
| SNUT2_HUMAN       | 24 | 1238 | 5/37  | 45 |
| SRC8_HUMAN        | 20 | 332  | 5/9   | 10 |
| SRP09_HUMAN       | 48 | 162  | 1/4   | 30 |
| SRP14_HUMAN       | 43 | 320  | 1/6   | 33 |
| SRPK1_HUMAN       | 17 | 135  | 0/2   | 3  |
| SYEP_HUMAN        | 10 | 329  | 0/5   | 3  |
| SYIC_HUMAN        | 11 | 338  | 0/7   | 5  |
| TBA4A_HUMAN       | 27 | 737  | 0/2   | 2  |
| TBA1B_HUMAN       | 27 | 937  | 7/24  | 36 |
| TBB2C, TBB5_HUMAN | 27 | 877  | 8/26  | 36 |
| TBB2C_HUMAN       | 27 | 836  | 2/4   | 7  |
| TBL1R_HUMAN       | 26 | 486  | 8/9   | 18 |
| TCP4_HUMAN        | 44 | 169  | 1/4   | 26 |
| TCPA_HUMAN        | 25 | 113  | 0/3   | 7  |
| TCPG_HUMAN        | 25 | 160  | 0/2   | 4  |
| TFG_HUMAN         | 26 | 343  | 5/11  | 24 |
| TFR1_HUMAN        | 18 | 212  | 0/5   | 7  |
| THIO_HUMAN        | 47 | 143  | 1/4   | 29 |
| TIF1B_HUMAN       | 17 | 1096 | 12/31 | 26 |
| TIM14_HUMAN       | 47 | 96   | 0/2   | 19 |

|                  |    |      |        |    |
|------------------|----|------|--------|----|
| TMEDA_HUMAN      | 40 | 100  | 0/2    | 8  |
| TPM3_HUMAN       | 34 | 409  | 0/3    | 27 |
| TPM4_HUMAN       | 34 | 421  | 0/9    | 30 |
| TRI25_HUMAN      | 23 | 126  | 0/3    | 4  |
| TSSC4_HUMAN      | 29 | 148  | 0/5    | 10 |
| TXN4A_HUMAN      | 48 | 1198 | 0/27   | 61 |
| U520_HUMAN       | 8  | 6475 | 48/157 | 46 |
| U5S1_HUMAN       | 15 | 3364 | 25/83  | 53 |
| QCR8, QCR7_HUMAN | 48 | 127  | 2/4    | 37 |
| USP9X_HUMAN      | 5  | 112  | 0/5    | 1  |
| VIME_HUMAN       | 27 | 917  | 3/16   | 35 |
| WBP11_HUMAN      | 18 | 1575 | 27/42  | 36 |
| WDR23_HUMAN      | 25 | 499  | 2/10   | 18 |
| YBOX1_HUMAN      | 29 | 310  | 1/6    | 25 |
| ZCCHV_HUMAN      | 17 | 176  | 1/2    | 4  |

\*includes all peptides that were uniquely assigned to one protein homology or identity based on a significant score given by Mascot
